# Supplementary material for: Helical peptides from VEGF and Vammin hotspots for modulating the VEGF–VEGFR interaction
Source: Royal Society of Chemistry journal article supplement (doi:10.1039/c3ob27312a), 2013-01-01
Supplement: c3ob27312a.pdf [file c3ob27312a.pdf]

## Electronic Supplementary Information for

### Helical peptides from VEGF and Vammin hot-spots for modulating the VEGF/VEGFR interaction

María Isabel García-Aranda,<sup>a</sup> Susana González-López,<sup>a</sup> Clara María Santiveri,<sup>b</sup> Nathalie Gagey-Eilstein,<sup>c</sup> Marie Reille-Seroussi,<sup>c</sup> Mercedes Martín-Martínez,<sup>a</sup> Nicolas Inguibert,<sup>c,d</sup> Michel Vidal,<sup>c,e</sup> María Teresa García-López,<sup>a</sup> María Angeles Jiménez,<sup>b</sup> Rosario González-Muñiz,<sup>a</sup> María Jesús Pérez de Vega.\*<sup>a</sup>

<sup>a</sup>Instituto de Química Médica, CSIC. C/ Juan de la Cierva, 3. 28006 Madrid (Spain).

<sup>b</sup>Instituto de Química-Física Rocasolano, CSIC. C/ Serrano, 119. 28006 Madrid (Spain).

<sup>c</sup>Université Paris Descartes, UFR des Sciences Pharmaceutiques et Biologiques, UMR CNRS 8638, 4 Avenue de l'Observatoire, Paris F-75270 (France).

<sup>d</sup>Université de Perpignan Via Domitia, Laboratoire de Chimie des Biomolécules et de l'Environnement, EA 4215, 52 Avenue P. Alduy, Perpignan F-66860 (France).

<sup>e</sup>UF « Pharmacinétique et Pharmacochimie », GH Cochin – Hôtel Dieu – Broca, Hôpital Cochin, AP-HP, Paris (France).

<sup>f</sup>Departamento de Biología Vascular e Inflamación. Centro Nacional de Investigaciones Cardiovasculares, CNIC. C/ Melchor Fernández Almagro, 3. 28029 Madrid (Spain).

### Table of Contents

|                                                                                        |     |
|----------------------------------------------------------------------------------------|-----|
| Synthetic procedures .....                                                             | S1  |
| Characterization of compounds <b>1-8, 15-18</b> .....                                  | S3  |
| <sup>1</sup> H and <sup>13</sup> C chemical shifts ( $\delta$ , ppm) of peptides ..... | S5  |
| Summary of structural statistics data .....                                            | S17 |
| Circular Dichroism experiments .....                                                   | S18 |
| Observed $\Delta\delta_{C\alpha}$ .....                                                | S21 |
| NOE summaries .....                                                                    | S24 |
| NMR calculated structures .....                                                        | S27 |
| Chemiluminescent competition assays. Reagents and materials .....                      | S34 |

### Synthetic procedures

General: All reagents were of commercial quality. Amino acids and HOBt were provided by NEOMPS, DIC by FLUKA, PyAOP, HOAt, Pd(PPh<sub>3</sub>)<sub>4</sub> and PhSiH<sub>3</sub> by ALDRICH and Rink Amide resin by NOVABIOCHEM. Solvents were dried and purified by standard methods. Analytical RP-HPLC was performed on a Waters 600 HPLC equipment equipped with a reverse-phase ACE-5 C18-300 column (4.6 × 250 mm), with a flow rate of 1.3 mL/min, and using a Waters 2487 detector. Mixtures of CH<sub>3</sub>CN (solvent A) and H<sub>2</sub>O + 0.05% TFA (solvent B) were used as mobile phase. For purification of all compounds, a semipreparative column ACE 5 C18-300 (10 x 250

mm) was used with the same mixture of solvents than in analytical. Electrospray mass spectra (ES-MS) were performed, in positive mode, in a Waters HPLC-MS ZQ 2000 equipment. HRMS (EI<sup>+</sup>) was carried out in an Agilent 6520 Accurate-Mass Q-TOF LC/MS equipment.

Resins were swollen in DCM/DMF/DCM/DMF (4 × 0.5 min). All compounds were synthesized manually in parallel on resin, following the Fmoc/*t*Bu strategy, using Fmoc-Glu(O*t*Bu)-OH, Fmoc-Val-OH, Fmoc-Lys(Boc)-OH, Fmoc-Phe-OH, Fmoc-Leu-OH, Fmoc-Ile-OH, Fmoc-Met-OH, Fmoc-Arg(Pbf)-OH, Fmoc-His(Trt)-OH, Fmoc-Asp(O*t*Bu)-OH, Fmoc-Tyr(*t*Bu)-OH, Fmoc-Pro-OH, Fmoc-Gln(Trt)-OH, Fmoc-Ser(*t*Bu)-OH, Fmoc-Asn(Trt)-OH, Fmoc-Ala-OH, Fmoc-Lys(Alloc)-OH or Fmoc-Glu(All)-OH as required, and were isolated in high purity (>98%) by semipreparative HPLC

**General coupling procedure.** Rink amide resin (100 mg, 0.034 mmol) previously swollen, was treated with 20% piperidine in DMF (1 × 1 min) and (3 × 10 min) and washed with DMF/DCM/DMF/DCM/DMF (4 × 0.5 min). **Method A:** Then a solution of the corresponding amino acid (0.051 mmol) in anhydrous DMF (1 ml), HOBt (7.8 mg, 0.051 mmol) and DIC (7.8 μl, 0.051 mmol) were added. Couplings were allowed to proceed at room temperature overnight. **Method B:** Then a solution of the corresponding amino acid (0.068 mmol) in anhydrous DMF (1 ml), HCTU (28 mg, 0.068 mmol) and DIEA (22 μl, 0.126 mmol) were added. Couplings were allowed to proceed at room temperature for an hour. When necessary, the coupling was repeated with a fresh portion of Fmoc-amino acid and the indicated coupling reagents. After complete coupling, the resins were drained and washed with DMF/DCM/DMF/DCM (5 × 0.5 min).

Coupling reactions to primary amines were monitored by the Kaiser ninhydrin test and to secondary amines by the cloranil test.

**General acetylation procedure.** The Fmoc-resin-bounded derivative, previously swollen, was treated with 20% piperidine in DMF (1 × 1 min) and (3 × 10 min) and washed with DMF/DCM/DMF/DCM/DMF (4 × 0.5 min). Then a mixture of acetic anhydride/DIEA/DMF (1:1:1) was added (1 × 1 min) and (4 × 10 min) and washed with DMF/DCM/DMF/DCM/DMF (4 × 0.5 min).

**General procedure for removing of Alloc and OAll protecting groups:** The resin-bounded derivative, previously swollen, was purged with Ar and treated with a solution of Pd(PPh<sub>3</sub>)<sub>4</sub> (10 mg, 0.008 mmol) and PhSiH<sub>3</sub> (0.1 ml, 0.82 mmol) in DCM (2 ml). The reaction mixture is stirred for 45 min. This procedure was repeated once more. The resin was washed with DCM/DMF/Et<sub>2</sub>NCS<sub>2</sub>Na (0.02M)/DMF/DCM (4 × 0.5 min).

**General cleavage procedure.** The resin-bounded derivative was treated with 1 ml of TFA/EDT/H<sub>2</sub>O/TIS (94:2.5:2.5:1) for 5 h at room temperature. The filtrates were precipitated from diethylether and centrifuged three times at 5000 rpm for 10 min. After the lyophilisation of the compound, the obtained peptide was purified by semipreparative HPLC.

**Lactamization reaction.** After removing of Alloc and OAll protecting groups, the linear-resin-bounded derivative (100 mg, 0.034 mmol), previously swollen, was treated with a solution of PyAOP (177 mg, 0.34 mmol), HOAt (46 mg, 0.34 mmol), DIEA (0.12 ml, 0.68 mmol) in anhydrous DCE with 15% of trifluoroethanol (2 ml). The reaction was allowed to proceed at 120°C for 1h under microwave radiation until ninhydrine test was negative. The resin was washed and drained with DMF/DCM/DMF/DCM (4 × 0.5 min).

### Characterization of compounds 1-8, 15-18

**Ac-Glu<sup>1</sup>-Val<sup>2</sup>-Val<sup>3</sup>-Lys<sup>4</sup>-Phe<sup>5</sup>-Met<sup>6</sup>-Asp<sup>7</sup>-Val<sup>8</sup>-Tyr<sup>9</sup>-Gln<sup>10</sup>-Arg<sup>11</sup>-Ser<sup>12</sup>-Tyr<sup>13</sup>-NH<sub>2</sub> (1):** Method A. The peptide was cleaved and purified by semipreparative HPLC (15% A 2 min, 15 to 25% A in 25 min, 25 to 100% A in 3 min) obtaining 4.1 mg of a white solid with a purity of 99% (7% total yield). HPLC:  $t_R = 22.14$  min. ESI-MS:  $[M + 2H]^{2+} = 853.10$ . HRMS (EI+)  $m/z$  1703.8321 ( $[M]^+$  C<sub>78</sub>H<sub>117</sub>N<sub>19</sub>O<sub>22</sub>S, requires 1703.8341).

**Ac-Glu<sup>1</sup>-Val<sup>2</sup>-Gln<sup>3</sup>-Lys<sup>4</sup>-Phe<sup>5</sup>-Leu<sup>6</sup>-Glu<sup>7</sup>-Val<sup>8</sup>-Tyr<sup>9</sup>-Leu<sup>10</sup>-Arg<sup>11</sup>-Leu<sup>12</sup>-Tyr<sup>13</sup>-NH<sub>2</sub> (2):** Method A. The peptide was cleaved and purified by semipreparative HPLC (20% A 2 min, 20 to 55% A in 25 min, 55 to 100% A in 3 min) obtaining 4.1 mg of a white solid with a purity of 98% (7% total yield). HPLC:  $t_R = 21.64$  min. EM-ES:  $[M + 2H]^{2+} = 871.68$ ,  $[M + 3H]^{3+} = 581.66$ . HRMS (EI+)  $m/z$  1741.9780 ( $[M]^+$  C<sub>84</sub>H<sub>131</sub>N<sub>19</sub>O<sub>21</sub>, requires 1741.9767).

**Ac-Ser<sup>1</sup>-Ser<sup>2</sup>-Gln<sup>3</sup>-Lys<sup>4</sup>-Phe<sup>5</sup>-Leu<sup>6</sup>-Glu<sup>7</sup>-Val<sup>8</sup>-Tyr<sup>9</sup>-Gln<sup>10</sup>-Arg<sup>11</sup>-Leu<sup>12</sup>-Tyr<sup>13</sup>-Asn<sup>14</sup>-NH<sub>2</sub> (3):** Method B. The peptide was cleaved and purified by semipreparative HPLC (10% A 2 min, 10 to 50% A in 25 min, 50 to 100% A in 3 min) obtaining 3.1 mg of a white solid with a purity of 99% (5% total yield). HPLC:  $t_R = 20.43$  min. EM-ES:  $[M + H]^+ = 1817.6$ ,  $[M + 2H]^{2+} = 909.3$ ,  $[M + 3H]^{3+} = 606.5$ . HRMS (EI+)  $m/z$  1814.9302 ( $[M]^+$  C<sub>83</sub>H<sub>126</sub>N<sub>22</sub>O<sub>24</sub>, requires 1814.9315).

**Ac-Ser<sup>1</sup>-Ser<sup>2</sup>-Gln<sup>3</sup>-Lys<sup>4</sup>-Phe<sup>5</sup>-Leu<sup>6</sup>-Glu<sup>7</sup>-Val<sup>8</sup>-Tyr<sup>9</sup>-Leu<sup>10</sup>-Arg<sup>11</sup>-Leu<sup>12</sup>-Tyr<sup>13</sup>-Asn<sup>14</sup>-NH<sub>2</sub> (4):** Method B. The peptide was cleaved and purified by semipreparative HPLC (10% A 2 min, 10 to 50% A in 25 min, 50 to 100% A in 3 min) obtaining 4.9 mg of a white solid with a purity of 98% (8% total yield). HPLC:  $t_R = 22.20$  min. EM-ES:  $[M + H]^+ = 1802.8$ ,  $[M + 2H]^{2+} = 901.3$ . HRMS (EI+)  $m/z$  1799.9615 ( $[M]^+$  C<sub>84</sub>H<sub>129</sub>N<sub>21</sub>O<sub>23</sub>, requires 1799.9570).

**Ac-Glu<sup>1</sup>-Val<sup>2</sup>-Arg<sup>3</sup>-Pro<sup>4</sup>-Phe<sup>5</sup>-Leu<sup>6</sup>-Glu<sup>7</sup>-Val<sup>8</sup>-His<sup>9</sup>-Glu<sup>10</sup>-Arg<sup>11</sup>-Ser<sup>12</sup>-Ala<sup>13</sup>-NH<sub>2</sub> (5):** Method B. The peptide was cleaved and purified by semipreparative HPLC (15% A 2 min, 15 to 30% A in 25 min, 30 to 100% A in 3 min) obtaining 4.4 mg of a white solid with a purity of 99% (8% total yield). HPLC:  $t_R = 18.42$  min. EM-ES:  $[M + H]^+ = 1610.6$ ,  $[M + 2H]^{2+} = 806.0$ ,  $[M + 3H]^{3+} = 537.7$ . HRMS (EI+)  $m/z$  1607.8448 ( $[M]^+$  C<sub>72</sub>H<sub>113</sub>N<sub>21</sub>O<sub>21</sub>, requires 1607.8420).

**Ac-Asp<sup>1</sup>-Val<sup>2</sup>-Arg<sup>3</sup>-Arg<sup>4</sup>-Phe<sup>5</sup>-Leu<sup>6</sup>-Glu<sup>7</sup>-Val<sup>8</sup>-His<sup>9</sup>-Leu<sup>10</sup>-Arg<sup>11</sup>-Leu<sup>12</sup>-Ala<sup>13</sup>-NH<sub>2</sub> (6):** Method A. The peptide was cleaved and purified by semipreparative HPLC (15% A 2 min, 15 to 55% A in 25 min, 55 to 100% A in 3 min) obtaining 2.3 mg of a white solid with a purity of 98% (4% total yield). HPLC:  $t_R = 18.02$  min. EM-ES:  $[M + 2H]^{2+} = 834.17$ ,  $[M + 3H]^{3+} = 556.39$ ,  $[M + 4H]^{4+} = 417.63$ . HRMS (EI+)  $m/z$  1663.9631 ( $[M]^+$  C<sub>75</sub>H<sub>125</sub>N<sub>25</sub>O<sub>18</sub>, requires 1663.9634).

**Ac-Asp<sup>1</sup>-Leu<sup>2</sup>-Arg<sup>3</sup>-Ala<sup>4</sup>-Phe<sup>5</sup>-Leu<sup>6</sup>-Glu<sup>7</sup>-Gln<sup>8</sup>-His<sup>9</sup>-Leu<sup>10</sup>-Arg<sup>11</sup>-Ser<sup>12</sup>-Ala<sup>13</sup>-NH<sub>2</sub> (7):** Method B. The peptide was cleaved and purified by semipreparative HPLC (10% A 2 min, 10 to 50% A in 25 min, 50 to 100% A in 3 min) obtaining 4.3 mg of a white

solid with a purity of 98% (8% total yield). HPLC:  $t_R = 21.33$  min EM-ES:  $[M + H]^+ = 1597.3$ ,  $[M + 2H]^{2+} = 799.3$ ,  $[M + 3H]^{3+} = 533.3$ . HRMS (EI+)  $m/z$  1595.8508 ( $[M]^+$   $C_{70}H_{113}N_{23}O_{20}$ , requires 1595.8532).

**Ac-Ser<sup>1</sup>-Val<sup>2</sup>-Arg<sup>3</sup>-Arg<sup>4</sup>-Phe<sup>5</sup>-Leu<sup>6</sup>-Glu<sup>7</sup>-Ala<sup>8</sup>-His<sup>9</sup>-Leu<sup>10</sup>-Arg<sup>11</sup>-Leu<sup>12</sup>-Ala<sup>13</sup>-NH<sub>2</sub> (8):** Method B. The peptide was cleaved and purified by semipreparative HPLC (10% A 2 min, 10 to 50% A in 25 min, 50 to 100% A in 3 min) obtaining 4.9 mg of a white solid with a purity of 98% (9% total yield). HPLC:  $t_R = 21.02$  min. EM-ES  $[M + 2H]^{2+} = 805.3$ ,  $[M + 3H]^{3+} = 537.3$ . HRMS (EI+)  $m/z$  1607.9374 ( $[M]^+$   $C_{72}H_{121}N_{25}O_{17}$ , requires 1607.9372).

**Ac-Glu<sup>1</sup>-Val<sup>2</sup>-Glu<sup>3</sup>-Lys<sup>4</sup>-Phe<sup>5</sup>-Met(O<sub>2</sub>)<sup>6</sup>-Lys<sup>7</sup>-Val<sup>8</sup>-Tyr<sup>9</sup>-Gln<sup>10</sup>-Arg<sup>11</sup>-Ser<sup>12</sup>-Tyr<sup>13</sup>-NH<sub>2</sub> (15):** After the elongation of the peptide, using Method B, the Alloc and OAll groups were removed from the resin-bounded derivative. Then the peptide was cleaved and purified by semipreparative HPLC (15% A 2 min, 15 to 25% A in 25 min, 25 to 100% A in 3 min) obtaining 1.2 mg of a white solid with a purity of 99% (2% total yield). HPLC:  $t_R = 23.74$  min. EM-ES:  $[M + H]^+ = 1780.6$ ,  $[M + 2H]^{2+} = 890.8$ ,  $[M + 3H]^{3+} = 594.3$ . HRMS (EI+)  $m/z$  1778.8666 ( $[M]^+$   $C_{80}H_{122}N_{20}O_{24}S$ , requires 1778.8662).

**Ac-Glu<sup>1</sup>-Val<sup>2</sup>-c(NH-CO)<sup>3-7</sup>[Glu<sup>3</sup>-Lys<sup>4</sup>-Phe<sup>5</sup>-Met(O<sub>2</sub>)<sup>6</sup>-Lys<sup>7</sup>]-Val<sup>8</sup>-Tyr<sup>9</sup>-Gln<sup>10</sup>-Arg<sup>11</sup>-Ser<sup>12</sup>-Tyr<sup>13</sup>-NH<sub>2</sub> (16):** Over the compound 11 anchored to the resin, lactamization reaction was allowed to proceed under microwave radiation. After the cleavage, this peptide was purified by semipreparative HPLC (15% A 2 min, 15 to 45% A in 25 min, 45 to 100% A in 3 min) yielding 0.6 mg of a white solid with a purity of 99% (1% total yield). HPLC:  $t_R = 19.30$  min. EM-ES:  $[M + H]^+ = 1763.3$ ,  $[M + 2H]^{2+} = 881.7$ . HRMS (EI+)  $m/z$  1760.8536 ( $[M]^+$   $C_{80}H_{120}N_{20}O_{23}S$ , requires 1760.8556).

**Ac-Glu<sup>1</sup>-Val<sup>2</sup>-Val<sup>3</sup>-Lys<sup>4</sup>-Phe<sup>5</sup>-Met(O<sub>2</sub>)<sup>6</sup>-Glu<sup>7</sup>-Val<sup>8</sup>-Tyr<sup>9</sup>-Gln<sup>10</sup>-Lys<sup>11</sup>-Ser<sup>12</sup>-Tyr<sup>13</sup>-NH<sub>2</sub> (17):** After the elongation of the peptide, using Method B, the Alloc and OAll groups were removed from the resin-bounded derivative. Then the peptide was cleaved and purified by semipreparative HPLC (15% A 2 min, 15 to 45% A in 25 min, 45 to 100% A in 3 min) obtaining 2.9 mg of a white solid with a purity of 99% (5% total yield). HPLC:  $t_R = 17.64$  min. EM-ES:  $[M + H]^+ = 1724.6$ ,  $[M + 2H]^{2+} = 862.8$ . HRMS (EI+)  $m/z$  1721.8350 ( $[M]^+$   $C_{79}H_{119}N_{17}O_{24}S$ , requires 1721.8335).

**Ac-Glu<sup>1</sup>-Val<sup>2</sup>-Val<sup>3</sup>-Lys<sup>4</sup>-Phe<sup>5</sup>-Met(O<sub>2</sub>)<sup>6</sup>-c(NH-CO)<sup>7-11</sup>[Glu<sup>7</sup>-Val<sup>8</sup>-Tyr<sup>9</sup>-Gln<sup>10</sup>-Lys<sup>11</sup>]-Ser<sup>12</sup>-Tyr<sup>13</sup>-NH<sub>2</sub> (18):** Over the compound 13 anchored to the resin, lactamization reaction was allowed to proceed under microwave radiation. After the cleavage, this peptide was purified by semipreparative HPLC (15% A 2 min, 15 to 55% A in 25 min, 55 to 100% A in 3 min) yielding 1.2 mg of a white solid with a purity of 99% (2% total yield). HPLC:  $t_R = 18.08$  min. EM-ES:  $[M + H]^+ = 1705.6$ ,  $[M + 2H]^{2+} = 853.3$ ,  $[M + 3H]^{3+} = 543.5$ . HRMS (EI+)  $m/z$  1703.8227 ( $[M]^+$   $C_{79}H_{117}N_{17}O_{23}S$ , requires 1703.8229).

**Table ST1.**  $^1\text{H}$ , and  $^{13}\text{C}$  chemical shifts (ppm, from DSS) for compound **1** in 30%TFE at 25°C.

| <b>Ac-Glu<sup>1</sup>-Val<sup>2</sup>-Val<sup>3</sup>-Lys<sup>4</sup>-Phe<sup>5</sup>-Met<sup>6</sup>-Asp<sup>7</sup>-Val<sup>8</sup>-Tyr<sup>9</sup>-Gln<sup>10</sup>-Arg<sup>11</sup>-Ser<sup>12</sup>-Tyr<sup>13</sup>-NH<sub>2</sub></b> |               |                        |                           |                       |                          |                                                                                                                                                                                                                                           |
|----------------------------------------------------------------------------------------------------------------------------------------------------------------------------------------------------------------------------------------------|---------------|------------------------|---------------------------|-----------------------|--------------------------|-------------------------------------------------------------------------------------------------------------------------------------------------------------------------------------------------------------------------------------------|
| Residue                                                                                                                                                                                                                                      | HN            | $^{13}\text{C}_\alpha$ | $\text{C}_\alpha\text{H}$ | $^{13}\text{C}_\beta$ | $\text{C}_\beta\text{H}$ | Others                                                                                                                                                                                                                                    |
| CH <sub>3</sub> CO                                                                                                                                                                                                                           |               |                        |                           |                       |                          | CH <sub>3</sub> 2.10; $^{13}\text{C}$ 24.5                                                                                                                                                                                                |
| Glu 1                                                                                                                                                                                                                                        | 8.39          | 58.3                   | 4.22                      | 30.1                  | 2.00, 2.10               | $\text{C}_{\gamma\gamma}\text{H}$ 2.36, 2.36; $^{13}\text{C}_\gamma$ 36.5                                                                                                                                                                 |
| Val 2                                                                                                                                                                                                                                        | 7.96          | 64.7                   | 3.99                      | 32.5                  | 2.13                     | $\text{C}_\gamma\text{H}_3$ 0.99; $^{13}\text{C}_\gamma$ 20.7<br>$\text{C}_\gamma\text{H}_3$ 1.04; $^{13}\text{C}_\gamma$ 21.1                                                                                                            |
| Val 3                                                                                                                                                                                                                                        | 7.56          | 65.0                   | 3.90                      | 32.2                  | 2.14                     | $\text{C}_\gamma\text{H}_3$ 0.98; $^{13}\text{C}_\gamma$ 21.1<br>$\text{C}_\gamma\text{H}_3$ 1.02; $^{13}\text{C}_\gamma$ 21.3                                                                                                            |
| Lys 4                                                                                                                                                                                                                                        | 7.79          | 58.3                   | 4.22                      | 32.7                  | 1.86, 1.86               | $\text{C}_{\gamma\gamma}\text{H}$ 1.40, 1.46; $^{13}\text{C}_\gamma$ 25.2<br>$\text{C}_{\delta\delta}\text{H}$ 1.71, 1.71; $^{13}\text{C}_\delta$ 29.5<br>$\text{C}_{\epsilon\epsilon}\text{H}$ 2.96, 2.96; $^{13}\text{C}_\epsilon$ 42.4 |
| Phe 5                                                                                                                                                                                                                                        | 8.04          | 60.5                   | 4.39                      | 39.2                  | 3.20, 3.20               | $\text{C}_{\delta\delta}\text{H}$ 7.22, 7.22<br>$\text{C}_{\epsilon\epsilon}\text{H}$ 7.26, 7.26<br>$\text{C}_\zeta\text{H}$ ----                                                                                                         |
| Met 6                                                                                                                                                                                                                                        | 8.31          | 60.3                   | 4.31                      | 32.4                  | 2.15, 2.22               | $\text{C}_{\gamma\gamma}\text{H}$ 2.64, 2.76; $^{13}\text{C}_\gamma$ 32.6<br>$\text{C}_\epsilon\text{H}_3$ 2.08; $^{13}\text{C}_\epsilon$ 16.5                                                                                            |
| Asp 7                                                                                                                                                                                                                                        | 8.07          | nd                     | 4.53                      | 41.7                  | 2.84, 2.84               |                                                                                                                                                                                                                                           |
| Val 8                                                                                                                                                                                                                                        | 7.78          | 66.0                   | 3.70                      | 32.3                  | 2.14                     | $\text{C}_\gamma\text{H}_3$ 0.88; $^{13}\text{C}_\gamma$ 20.9<br>$\text{C}_\gamma\text{H}_3$ 1.01; $^{13}\text{C}_\gamma$ 21.8                                                                                                            |
| Tyr 9                                                                                                                                                                                                                                        | 8.48          | 61.6                   | 4.15                      | 38.7                  | 2.84, 3.07               | $\text{C}_{\delta\delta}\text{H}$ 7.06, 7.06<br>$\text{C}_{\epsilon\epsilon}\text{H}$ 6.77, 6.77                                                                                                                                          |
| Gln 10                                                                                                                                                                                                                                       | 8.40          | 58.6                   | 4.07                      | 29.0                  | 2.22, 2.26               | $\text{C}_{\gamma\gamma}\text{H}$ 2.48, 2.62; $^{13}\text{C}_\gamma$ 34.6<br>$\text{N}_{\epsilon\epsilon}\text{H}_2$ 6.70, 7.26                                                                                                           |
| Arg 11                                                                                                                                                                                                                                       | 7.95          | 58.1                   | 4.19                      | 30.7                  | 1.87, 1.87               | $\text{C}_{\gamma\gamma}\text{H}$ 1.68, 1.82; $^{13}\text{C}_\gamma$ 28.1<br>$\text{C}_{\delta\delta}\text{H}$ 3.14, 3.21; $^{13}\text{C}_\delta$ 43.7<br>$\text{N}_\epsilon\text{H}$ 7.40                                                |
| Ser 12                                                                                                                                                                                                                                       | 7.88          | 60.3                   | 4.31                      | 64.0                  | 3.58, 3.72               |                                                                                                                                                                                                                                           |
| Tyr 13                                                                                                                                                                                                                                       | 7.87          | nd                     | 4.45                      | 39.2                  | 2.61, 3.03               | $\text{C}_{\delta\delta}\text{H}$ 7.00, 7.00<br>$\text{C}_{\epsilon\epsilon}\text{H}$ 6.77, 6.77                                                                                                                                          |
| CONH <sub>2</sub>                                                                                                                                                                                                                            | 6.96,<br>7.26 |                        |                           |                       |                          |                                                                                                                                                                                                                                           |

**Table ST2.** <sup>1</sup>H, and <sup>13</sup>C chemical shifts (ppm, from DSS) for compound **2** in 30% TFE at 25°C.

| <b>Ac-Glu<sup>1</sup>-Val<sup>2</sup>-Gln<sup>3</sup>-Lys<sup>4</sup>-Phe<sup>5</sup>-Leu<sup>6</sup>-Glu<sup>7</sup>-Val<sup>8</sup>-Tyr<sup>9</sup>-Leu<sup>10</sup>-Arg<sup>11</sup>-Leu<sup>12</sup>-Tyr<sup>13</sup>-NH<sub>2</sub></b> |               |                              |                  |                              |                  |                                                                                                                                                                                                               |
|----------------------------------------------------------------------------------------------------------------------------------------------------------------------------------------------------------------------------------------------|---------------|------------------------------|------------------|------------------------------|------------------|---------------------------------------------------------------------------------------------------------------------------------------------------------------------------------------------------------------|
| Residue                                                                                                                                                                                                                                      | HN            | <sup>13</sup> C <sub>α</sub> | C <sub>α</sub> H | <sup>13</sup> C <sub>β</sub> | C <sub>β</sub> H | Others                                                                                                                                                                                                        |
| CH <sub>3</sub> CO                                                                                                                                                                                                                           |               |                              |                  |                              |                  | CH <sub>3</sub> 2.12; <sup>13</sup> C 24.6                                                                                                                                                                    |
| Glu 1                                                                                                                                                                                                                                        | 8.36          | 58.3                         | 4.26             | 29.8                         | 2.03, 2.14       | C <sub>γγ'</sub> H 2.36, 2.36; <sup>13</sup> C <sub>γ</sub> 36.5                                                                                                                                              |
| Val 2                                                                                                                                                                                                                                        | 8.07          | 65.9                         | 3.88             | 32.1                         | 2.10             | C <sub>γ</sub> H <sub>3</sub> 0.99; <sup>13</sup> C <sub>γ</sub> 20.6<br>C <sub>γ</sub> 'H <sub>3</sub> 1.06; <sup>13</sup> C <sub>γ</sub> ' 21.6                                                             |
| Gln 3                                                                                                                                                                                                                                        | 8.32          | 59.9                         | 4.01             | 28.2                         | 2.11, 2.15       | C <sub>γγ'</sub> H 2.44, 2.47; <sup>13</sup> C <sub>γ</sub> 34.4<br>N <sub>εε'</sub> H <sub>2</sub> 6.70, 7.42                                                                                                |
| Lys 4                                                                                                                                                                                                                                        | 7.72          | 59.1                         | 4.14             | 32.3                         | 1.91, 1.91       | C <sub>γγ'</sub> H 1.40, 1.46; <sup>13</sup> C <sub>γ</sub> nd<br>C <sub>δδ'</sub> H 1.71, 1.71; <sup>13</sup> C <sub>δ</sub> 29.2<br>C <sub>εε'</sub> H 2.96, 2.96; <sup>13</sup> C <sub>ε</sub> 42.4        |
| Phe 5                                                                                                                                                                                                                                        | 7.81          | nd                           | 4.34             | 39.1                         | 3.23, 3.27       | C <sub>δδ'</sub> H 7.14, 7.14<br>C <sub>εε'</sub> H 7.21, 7.21<br>C <sub>ζ</sub> H ----                                                                                                                       |
| Leu 6                                                                                                                                                                                                                                        | 8.34          | 58.4                         | 4.04             | 42.1                         | 1.63, 1.87       | C <sub>γ</sub> H 1.88; <sup>13</sup> C <sub>γ</sub> 27.2<br>C <sub>δ</sub> H <sub>3</sub> 0.90; <sup>13</sup> C <sub>δ</sub> 23.1<br>C <sub>δ</sub> 'H <sub>3</sub> 0.92; <sup>13</sup> C <sub>δ</sub> ' 25.1 |
| Glu 7                                                                                                                                                                                                                                        | 7.98          | 60.1                         | 3.95             | 29.4                         | 2.14, 2.25       | C <sub>γγ'</sub> H 2.33, 2.55; <sup>13</sup> C <sub>γ</sub> 36.0                                                                                                                                              |
| Val 8                                                                                                                                                                                                                                        | 7.59          | 66.8                         | 3.64             | 32.2                         | 2.19             | C <sub>γ</sub> H <sub>3</sub> 0.93; <sup>13</sup> C <sub>γ</sub> 21.1<br>C <sub>γ</sub> 'H <sub>3</sub> 1.08; <sup>13</sup> C <sub>γ</sub> ' 22.3                                                             |
| Tyr 9                                                                                                                                                                                                                                        | 8.45          | nd                           | 3.98             | 39.0                         | 2.77, 3.01       | C <sub>δδ'</sub> H 6.96, 6.96<br>C <sub>εε'</sub> H 6.67, 6.67                                                                                                                                                |
| Leu 10                                                                                                                                                                                                                                       | 8.73          | 57.9                         | 4.02             | 42.0                         | 1.49, 1.95       | C <sub>γ</sub> H 2.00; <sup>13</sup> C <sub>γ</sub> 27.4<br>C <sub>δ</sub> H <sub>3</sub> 0.93; <sup>13</sup> C <sub>δ</sub> 22.4<br>C <sub>δ</sub> 'H <sub>3</sub> 0.96; <sup>13</sup> C <sub>δ</sub> ' 24.5 |
| Arg 11                                                                                                                                                                                                                                       | 7.69          | 58.8                         | 4.08             | 30.3                         | 1.91, 1.99       | C <sub>γγ'</sub> H 1.67, 1.84; <sup>13</sup> C <sub>γ</sub> 28.0<br>C <sub>δδ'</sub> H 3.18, 3.18; <sup>13</sup> C <sub>δ</sub> 43.5<br>N <sub>ε</sub> H 7.36                                                 |
| Leu 12                                                                                                                                                                                                                                       | 8.02          | 57.2                         | 4.07             | 43.1                         | 0.87, 1.44       | C <sub>γ</sub> H 1.55; <sup>13</sup> C <sub>γ</sub> 26.9<br>C <sub>δ</sub> H <sub>3</sub> 0.70; <sup>13</sup> C <sub>δ</sub> 22.6<br>C <sub>δ</sub> 'H <sub>3</sub> 0.76; <sup>13</sup> C <sub>δ</sub> ' 24.9 |
| Tyr 13                                                                                                                                                                                                                                       | 8.16          | nd                           | 4.44             | 39.2                         | 2.31, 2.97       | C <sub>δδ'</sub> H 6.90, 6.90<br>C <sub>εε'</sub> H 6.72, 6.72                                                                                                                                                |
| CONH <sub>2</sub>                                                                                                                                                                                                                            | 6.84,<br>7.21 |                              |                  |                              |                  |                                                                                                                                                                                                               |

**Table ST3.**  $^1\text{H}$ , and  $^{13}\text{C}$  chemical shifts (ppm, from DSS) for compound **3** in 30% TFE at 25°C.

| <b>Ac-Ser<sup>1</sup>-Ser<sup>2</sup>-Gln<sup>3</sup>-Lys<sup>4</sup>-Phe<sup>5</sup>-Leu<sup>6</sup>-Glu<sup>7</sup>-Val<sup>8</sup>-Tyr<sup>9</sup>-Gln<sup>10</sup>-Arg<sup>11</sup>-Leu<sup>12</sup>-Tyr<sup>13</sup>-Asn<sup>14</sup>-NH<sub>2</sub></b> |               |                        |                           |                       |                          |                                                                                                                                                                                                                                      |
|---------------------------------------------------------------------------------------------------------------------------------------------------------------------------------------------------------------------------------------------------------------|---------------|------------------------|---------------------------|-----------------------|--------------------------|--------------------------------------------------------------------------------------------------------------------------------------------------------------------------------------------------------------------------------------|
| Residue                                                                                                                                                                                                                                                       | HN            | $^{13}\text{C}_\alpha$ | $\text{C}_\alpha\text{H}$ | $^{13}\text{C}_\beta$ | $\text{C}_\beta\text{H}$ | Others                                                                                                                                                                                                                               |
| CH <sub>3</sub> CO                                                                                                                                                                                                                                            |               |                        |                           |                       |                          | CH <sub>3</sub> 2.10; $^{13}\text{C}$ 24.6                                                                                                                                                                                           |
| Ser 1                                                                                                                                                                                                                                                         | 8.06          | 59.0                   | 4.48                      | 64.2                  | 3.90, 4.01               |                                                                                                                                                                                                                                      |
| Ser 2                                                                                                                                                                                                                                                         | 8.47          | 60.2                   | 4.44                      | 63.5                  | 3.97, 4.02               |                                                                                                                                                                                                                                      |
| Gln 3                                                                                                                                                                                                                                                         | 8.34          | 58.7                   | 4.18                      | 28.7                  | 2.12, 2.12               | $\text{C}_{\gamma\gamma'}\text{H}$ 2.44, 2.44; $^{13}\text{C}_\gamma$ 34.1<br>$\text{N}_{\text{ee}}\text{H}_2$ 6.73, 7.42                                                                                                            |
| Lys 4                                                                                                                                                                                                                                                         | 7.95          | 58.7                   | 4.17                      | 32.2                  | 1.86, 1.86               | $\text{C}_{\gamma\gamma'}\text{H}$ 1.46, 1.46; $^{13}\text{C}_\gamma$ 24.9<br>$\text{C}_{\delta\delta'}\text{H}$ 1.71, 1.71; $^{13}\text{C}_\delta$ 29.0<br>$\text{C}_{\text{ee}}\text{H}$ 2.96, 2.96; $^{13}\text{C}_\epsilon$ 42.3 |
| Phe 5                                                                                                                                                                                                                                                         | 7.89          | 61.0                   | 4.32                      | 39.0                  | 3.20, 3.20               | $\text{C}_{\delta\delta'}\text{H}$ 7.27, 7.27<br>$\text{C}_{\text{ee}}\text{H}$ 7.22, 7.22<br>$\text{C}_\zeta\text{H}$ ----                                                                                                          |
| Leu 6                                                                                                                                                                                                                                                         | 7.89          | 58.2                   | 4.10                      | 42.0                  | 1.67, 1.86               | $\text{C}_\gamma\text{H}$ 1.79; $^{13}\text{C}_\gamma$ 27.3<br>$\text{C}_\delta\text{H}_3$ 0.92; $^{13}\text{C}_\delta$ 23.3<br>$\text{C}_\delta'\text{H}_3$ 0.97; $^{13}\text{C}_{\delta'}$ 24.6                                    |
| Glu 7                                                                                                                                                                                                                                                         | 7.95          | 59.6                   | 4.09                      | 29.3                  | 2.17, 2.26               | $\text{C}_{\gamma\gamma'}\text{H}$ 2.37, 2.54; $^{13}\text{C}_\gamma$ 35.5                                                                                                                                                           |
| Val 8                                                                                                                                                                                                                                                         | 7.79          | 66.7                   | 3.65                      | 32.1                  | 2.16                     | $\text{C}_\gamma\text{H}_3$ 0.91; $^{13}\text{C}_\gamma$ 20.8<br>$\text{C}_\gamma'\text{H}_3$ 1.05; $^{13}\text{C}_{\gamma'}$ 22.1                                                                                                   |
| Tyr 9                                                                                                                                                                                                                                                         | 8.38          | 62.0                   | 4.06                      | 38.6                  | 2.85, 3.02               | $\text{C}_{\delta\delta'}\text{H}$ 7.00, 7.00<br>$\text{C}_{\text{ee}}\text{H}$ 6.71, 6.71                                                                                                                                           |
| Gln10                                                                                                                                                                                                                                                         | 8.30          | 59.2                   | 3.99                      | 29.1                  | 2.18, 2.27               | $\text{C}_{\gamma\gamma'}\text{H}$ 2.44, 2.461; $^{13}\text{C}_\gamma$ 34.6<br>$\text{N}_{\text{ee}}\text{H}_2$ 6.68, 7.07                                                                                                           |
| Arg 11                                                                                                                                                                                                                                                        | 7.80          | 58.6                   | 4.16                      | 30.2                  | 1.97, 1.97               | $\text{C}_{\gamma\gamma'}\text{H}$ 1.72, 1.83; $^{13}\text{C}_\gamma$ 27.7<br>$\text{C}_{\delta\delta'}\text{H}$ 3.21, 3.21; $^{13}\text{C}_\delta$ 43.4<br>$\text{N}_\epsilon\text{H}$ 7.33                                         |
| Leu 12                                                                                                                                                                                                                                                        | 8.13          | 57.1                   | 4.13                      | 42.6                  | 1.20, 1.54               | $\text{C}_\gamma\text{H}$ 1.64; $^{13}\text{C}_\gamma$ 26.9<br>$\text{C}_\delta\text{H}_3$ 0.78; $^{13}\text{C}_\delta$ 22.6<br>$\text{C}_\delta'\text{H}_3$ 0.82; $^{13}\text{C}_{\delta'}$ 24.9                                    |
| Tyr 13                                                                                                                                                                                                                                                        | 8.09          | 59.6                   | 4.36                      | 38.7                  | 2.61, 2.93               | $\text{C}_{\delta\delta'}\text{H}$ 6.99, 6.99<br>$\text{C}_{\text{ee}}\text{H}$ 6.78, 6.78                                                                                                                                           |
| Asn 14                                                                                                                                                                                                                                                        | 7.81          | nd                     | 4.68                      | 39.5                  | 2.78, 2.89               | $\text{N}_{\delta\delta'}\text{H}_2$ 6.77, 7.58                                                                                                                                                                                      |
| CONH <sub>2</sub>                                                                                                                                                                                                                                             | 6.93,<br>7.10 |                        |                           |                       |                          |                                                                                                                                                                                                                                      |

**Table ST4.**  $^1\text{H}$ , and  $^{13}\text{C}$  chemical shifts (ppm, from DSS) for compound **4** in 30% TFE at 25°C.

| <b>Ac-Ser<sup>1</sup>-Ser<sup>2</sup>-Gln<sup>3</sup>-Lys<sup>4</sup>-Phe<sup>5</sup>-Leu<sup>6</sup>-Glu<sup>7</sup>-Val<sup>8</sup>-Tyr<sup>9</sup>-Leu<sup>10</sup>-Arg<sup>11</sup>-Leu<sup>12</sup>-Tyr<sup>13</sup>-Asn<sup>14</sup>-NH<sub>2</sub></b> |                       |                        |                           |                       |                          |                                                                                                                                                                                                                                  |
|---------------------------------------------------------------------------------------------------------------------------------------------------------------------------------------------------------------------------------------------------------------|-----------------------|------------------------|---------------------------|-----------------------|--------------------------|----------------------------------------------------------------------------------------------------------------------------------------------------------------------------------------------------------------------------------|
| Residue                                                                                                                                                                                                                                                       | HN                    | $^{13}\text{C}_\alpha$ | $\text{C}_\alpha\text{H}$ | $^{13}\text{C}_\beta$ | $\text{C}_\beta\text{H}$ | Others                                                                                                                                                                                                                           |
| CH <sub>3</sub> CO                                                                                                                                                                                                                                            |                       |                        |                           |                       |                          | CH <sub>3</sub> 2.10; $^{13}\text{C}$ 24.6                                                                                                                                                                                       |
| Ser 1                                                                                                                                                                                                                                                         | 8.03                  | 59.0                   | 4.49                      | 64.2                  | 3.90, 4.02               |                                                                                                                                                                                                                                  |
| Ser 2                                                                                                                                                                                                                                                         | 8.46                  | 60.4                   | 4.44                      | 63.5                  | 3.98, 4.02               |                                                                                                                                                                                                                                  |
| Gln 3                                                                                                                                                                                                                                                         | 8.35                  | 58.9                   | 4.18                      | 28.7                  | 2.13, 2.13               | $\text{C}_{\gamma\gamma}\text{H}$ 2.45, 2.45; $^{13}\text{C}_\gamma$ 34.2<br>$\text{N}_{\text{ee}}\text{H}_2$ 6.70, 7.40                                                                                                         |
| Lys 4                                                                                                                                                                                                                                                         | 7.95                  | 58.8                   | 4.17                      | 32.2                  | 1.86, 1.86               | $\text{C}_{\gamma\gamma}\text{H}$ 1.46, 1.46; $^{13}\text{C}_\gamma$ nd<br>$\text{C}_{\delta\delta}\text{H}$ 1.71, 1.71; $^{13}\text{C}_\delta$ 29.0<br>$\text{C}_{\text{ee}}\text{H}$ 2.96, 2.96; $^{13}\text{C}_\epsilon$ 42.4 |
| Phe 5                                                                                                                                                                                                                                                         | 7.89                  | 60.9                   | 4.35                      | 39.0                  | 3.20, 3.20               | $\text{C}_{\delta\delta}\text{H}$ 7.23, 7.23<br>$\text{C}_{\text{ee}}\text{H}$ 7.22, 7.22<br>$\text{C}_\zeta\text{H}$ ----                                                                                                       |
| Leu 6                                                                                                                                                                                                                                                         | 7.89                  | 58.4                   | 4.11                      | 42.2                  | 1.78, 1.78               | $\text{C}_\gamma\text{H}$ 1.79; $^{13}\text{C}_\gamma$ 27.3<br>$\text{C}_\delta\text{H}_3$ 0.95; $^{13}\text{C}_\delta$ 23.8<br>$\text{C}_\delta\text{H}_3$ 0.99; $^{13}\text{C}_\delta$ 24.0                                    |
| Glu 7                                                                                                                                                                                                                                                         | 7.95                  | 60.1                   | 3.96                      | 29.3                  | 2.16, 2.26               | $\text{C}_{\gamma\gamma}\text{H}$ 2.36, 2.53; $^{13}\text{C}_\gamma$ 35.6                                                                                                                                                        |
| Val 8                                                                                                                                                                                                                                                         | 7.79                  | 66.8                   | 3.64                      | 32.2                  | 2.18                     | $\text{C}_\gamma\text{H}_3$ 0.93; $^{13}\text{C}_\gamma$ 20.9<br>$\text{C}_\gamma\text{H}_3$ 1.07; $^{13}\text{C}_\gamma$ 22.3                                                                                                   |
| Tyr 9                                                                                                                                                                                                                                                         | 8.38                  | nd                     | 4.06                      | 38.7                  | 2.88, 3.06               | $\text{C}_{\delta\delta}\text{H}$ 7.00, 7.00<br>$\text{C}_{\text{ee}}\text{H}$ 6.70, 6.70                                                                                                                                        |
| Leu10                                                                                                                                                                                                                                                         | 8.30                  | 58.1                   | 4.04                      | 42.1                  | 1.50, 1.98               | $\text{C}_\gamma\text{H}$ 2.00; $^{13}\text{C}_\gamma$ 27.3<br>$\text{C}_\delta\text{H}_3$ 0.94; $^{13}\text{C}_\delta$ 22.5<br>$\text{C}_\delta\text{H}_3$ 0.94; $^{13}\text{C}_\delta$ 25.2                                    |
| Arg 11                                                                                                                                                                                                                                                        | 7.80                  | 58.9                   | 4.13                      | 30.1                  | 1.95, 2.02               | $\text{C}_{\gamma\gamma}\text{H}$ 1.71, 1.86; $^{13}\text{C}_\gamma$ 28.0<br>$\text{C}_{\delta\delta}\text{H}$ 3.20, 3.20; $^{13}\text{C}_\delta$ 43.5<br>$\text{N}_\epsilon\text{H}$ 7.35                                       |
| Leu 12                                                                                                                                                                                                                                                        | 8.13                  | 57.2                   | 4.15                      | 42.5                  | 1.26, 1.70               | $\text{C}_\gamma\text{H}$ 1.70; $^{13}\text{C}_\gamma$ 26.9<br>$\text{C}_\delta\text{H}_3$ 0.80; $^{13}\text{C}_\delta$ 22.7<br>$\text{C}_\delta\text{H}_3$ 0.84; $^{13}\text{C}_\delta$ 24.9                                    |
| Tyr 13                                                                                                                                                                                                                                                        | 8.09                  | 59.9                   | 4.30                      | 38.9                  | 2.67, 2.93               | $\text{C}_{\delta\delta}\text{H}$ 7.03, 7.03<br>$\text{C}_{\text{ee}}\text{H}$ 6.82, 6.82                                                                                                                                        |
| Asn 14<br>CONH <sub>2</sub>                                                                                                                                                                                                                                   | 7.81<br>6.93,<br>7.10 | nd                     | 4.64                      | 39.7                  | 2.76, 2.86               | $\text{N}_{\delta\delta}\text{H}_2$ 6.66, 7.54                                                                                                                                                                                   |



**Table ST5.**  $^1\text{H}$ , and  $^{13}\text{C}$  chemical shifts (ppm, from DSS) for compound **5** in 30% TFE at 25°C.

| <b>Ac-Glu<sup>1</sup>-Val<sup>2</sup>-Arg<sup>3</sup>-Pro<sup>4</sup>-Phe<sup>5</sup>-Leu<sup>6</sup>-Glu<sup>7</sup>-Val<sup>8</sup>-His<sup>9</sup>-Glu<sup>10</sup>-Arg<sup>11</sup>-Ser<sup>12</sup>-Ala<sup>13</sup>-NH<sub>2</sub></b> |               |                        |                           |                       |                          |                                                                                                                                                                                                           |
|----------------------------------------------------------------------------------------------------------------------------------------------------------------------------------------------------------------------------------------------|---------------|------------------------|---------------------------|-----------------------|--------------------------|-----------------------------------------------------------------------------------------------------------------------------------------------------------------------------------------------------------|
| Residue                                                                                                                                                                                                                                      | HN            | $^{13}\text{C}_\alpha$ | $\text{C}_\alpha\text{H}$ | $^{13}\text{C}_\beta$ | $\text{C}_\beta\text{H}$ | Others                                                                                                                                                                                                    |
| CH <sub>3</sub> CO                                                                                                                                                                                                                           |               |                        |                           |                       |                          | CH <sub>3</sub> 2.10; $^{13}\text{C}$ 24.4                                                                                                                                                                |
| Glu 1                                                                                                                                                                                                                                        | 8.24          | 57.0                   | 4.34                      | 30.6                  | 1.98, 2.07               | $\text{C}_{\gamma\gamma'}\text{H}$ 2.36, 2.36; $^{13}\text{C}_\gamma$ 36.5                                                                                                                                |
| Val 2                                                                                                                                                                                                                                        | 7.92          | 62.6                   | 4.27                      | 33.1                  | 2.21                     | $\text{C}_\gamma\text{H}_3$ 0.97; $^{13}\text{C}_\gamma$ 20.1<br>$\text{C}_\gamma'\text{H}_3$ 0.99; $^{13}\text{C}_\gamma'$ 21.0                                                                          |
| Arg 3                                                                                                                                                                                                                                        | 8.28          | 57.5                   | 4.45                      | 29.5                  | 1.86, 1.86               | $\text{C}_{\gamma\gamma'}\text{H}$ 1.70, 1.74; $^{13}\text{C}_\gamma$ 27.5<br>$\text{C}_{\delta\delta'}\text{H}$ 3.23, 3.23; $^{13}\text{C}_\delta$ 43.6 <sup>a</sup><br>$\text{N}_\epsilon\text{H}$ 7.56 |
| Pro 4                                                                                                                                                                                                                                        |               | 65.1                   | 4.37                      | 31.5                  | 1.75, 2.25               | $\text{C}_{\gamma\gamma'}\text{H}$ 1.99, 1.99; $^{13}\text{C}_\gamma$ 27.8<br>$\text{C}_{\delta\delta'}\text{H}$ 3.63, 3.71; $^{13}\text{C}_\delta$ 50.5                                                  |
| Phe 5                                                                                                                                                                                                                                        | 7.57          | 59.5                   | 4.45                      | 39.2                  | 3.22, 3.22               | $\text{C}_{\delta\delta'}\text{H}$ 7.25, 7.25<br>$\text{C}_{\epsilon\epsilon'}\text{H}$ 7.34, 7.34<br>$\text{C}_\zeta\text{H}$ ----                                                                       |
| Leu 6                                                                                                                                                                                                                                        | 7.96          | 57.1                   | 4.22                      | 42.4                  | 1.63, 1.81               | $\text{C}_\gamma\text{H}$ 1.72; $^{13}\text{C}_\gamma$ 27.2<br>$\text{C}_\delta\text{H}_3$ 0.92; $^{13}\text{C}_\delta$ 23.0<br>$\text{C}_\delta'\text{H}_3$ 0.96; $^{13}\text{C}_\delta'$ 24.9           |
| Glu 7                                                                                                                                                                                                                                        | 8.27          | 58.6                   | 4.18                      | 30.1                  | 2.08, 2.08               | $\text{C}_{\gamma\gamma'}\text{H}$ 2.28, 2.38; $^{13}\text{C}_\gamma$ 36.4                                                                                                                                |
| Val 8                                                                                                                                                                                                                                        | 7.86          | 64.8                   | 3.88                      | 32.4                  | 2.12                     | $\text{C}_\gamma\text{H}_3$ 0.90; $^{13}\text{C}_\gamma$ 20.9<br>$\text{C}_\gamma'\text{H}_3$ 1.00; $^{13}\text{C}_\gamma'$ 21.4                                                                          |
| His 9                                                                                                                                                                                                                                        | 8.24          | 58.1                   | 4.45                      | 29.1                  | 3.15, 3.30               | $\text{C}_{\delta 1}\text{H}$ 7.23<br>$\text{C}_{\epsilon 2}\text{H}$ 8.33                                                                                                                                |
| Glu 10                                                                                                                                                                                                                                       | 8.45          | 58.2                   | 4.22                      | 30.1                  | 2.14, 2.14               | $\text{C}_{\gamma\gamma'}\text{H}$ 2.38, 2.38; $^{13}\text{C}_\gamma$ 36.0                                                                                                                                |
| Arg 11                                                                                                                                                                                                                                       | 8.22          | 57.5                   | 4.31                      | 30.8                  | 1.89, 1.96               | $\text{C}_{\gamma\gamma'}\text{H}$ 1.73, 1.79; $^{13}\text{C}_\gamma$ 27.6<br>$\text{C}_{\delta\delta'}\text{H}$ 3.22, 3.22; $^{13}\text{C}_\delta$ 43.6 <sup>a</sup><br>$\text{N}_\epsilon\text{H}$ 7.38 |
| Ser 12                                                                                                                                                                                                                                       | 8.06          | 59.3                   | 4.43                      | 64.4                  | 3.91, 3.96               |                                                                                                                                                                                                           |
| Ala13                                                                                                                                                                                                                                        | 7.98          | 52.8                   | 4.31                      | 19.5                  | 1.42                     |                                                                                                                                                                                                           |
| CONH <sub>2</sub>                                                                                                                                                                                                                            | 6.94,<br>7.34 |                        |                           |                       |                          |                                                                                                                                                                                                           |

**Table ST6.**  $^1\text{H}$ , and  $^{13}\text{C}$  chemical shifts (ppm, from DSS) for compound **6** in 30%TFE at 25°C.

| <b>Ac-Asp<sup>1</sup>-Val<sup>2</sup>-Arg<sup>3</sup>-Arg<sup>4</sup>-Phe<sup>5</sup>-Leu<sup>6</sup>-Glu<sup>7</sup>-Val<sup>8</sup>-His<sup>9</sup>-Leu<sup>10</sup>-Arg<sup>11</sup>-Leu<sup>12</sup>-Ala<sup>13</sup>-NH<sub>2</sub></b> |               |                        |                           |                       |                          |                                                                                                                                                                                                         |
|----------------------------------------------------------------------------------------------------------------------------------------------------------------------------------------------------------------------------------------------|---------------|------------------------|---------------------------|-----------------------|--------------------------|---------------------------------------------------------------------------------------------------------------------------------------------------------------------------------------------------------|
| Residue                                                                                                                                                                                                                                      | HN            | $^{13}\text{C}_\alpha$ | $\text{C}_\alpha\text{H}$ | $^{13}\text{C}_\beta$ | $\text{C}_\beta\text{H}$ | Others                                                                                                                                                                                                  |
| CH <sub>3</sub> CO                                                                                                                                                                                                                           |               |                        |                           |                       |                          | CH <sub>3</sub> 2.05; $^{13}\text{C}$ 24.5                                                                                                                                                              |
| Asp 1                                                                                                                                                                                                                                        | 7.90          | nd                     | nd                        | 41.4                  | 2.65, 2.90               |                                                                                                                                                                                                         |
| Val 2                                                                                                                                                                                                                                        | 8.15          | 65.5                   | 3.90                      | 32.3                  | 2.17                     | $\text{C}_\gamma\text{H}_3$ 1.03; $^{13}\text{C}_\gamma$ 20.5<br>$\text{C}_\gamma\text{H}_3$ 1.06; $^{13}\text{C}_\gamma$ 22.4                                                                          |
| Arg 3                                                                                                                                                                                                                                        | 8.16          | 60.1                   | 4.04                      | 30.0                  | 1.98, 1.98               | $\text{C}_{\gamma\gamma}\text{H}$ 1.71, 1.79; $^{13}\text{C}_\gamma$ 27.6<br>$\text{C}_{\delta\delta}\text{H}$ 3.26, 3.26; $^{13}\text{C}_\delta$ 43.5 <sup>a</sup><br>$\text{N}_\epsilon\text{H}$ 7.70 |
| Arg 4                                                                                                                                                                                                                                        | 7.80          | 59.1                   | 4.17                      | 30.1                  | 1.92, 1.92               | $\text{C}_{\gamma\gamma}\text{H}$ 1.71, 1.71; $^{13}\text{C}_\gamma$ 27.5<br>$\text{C}_{\delta\delta}\text{H}$ 3.25, 3.25; $^{13}\text{C}_\delta$ 43.5 <sup>a</sup><br>$\text{N}_\epsilon\text{H}$ 7.30 |
| Phe 5                                                                                                                                                                                                                                        | 7.91          | 61.6                   | 4.30                      | 39.3                  | 3.23, 3.38               | $\text{C}_{\delta\delta}\text{H}$ 7.14, 7.14<br>$\text{C}_{\epsilon\epsilon}\text{H}$ 7.22, 7.22<br>$\text{C}_\zeta\text{H}$ ----                                                                       |
| Leu 6                                                                                                                                                                                                                                        | 8.65          | 58.8                   | 4.10                      | 42.1                  | 1.68, 2.00               | $\text{C}_\gamma\text{H}$ 1.96; $^{13}\text{C}_\gamma$ 27.2<br>$\text{C}_\delta\text{H}_3$ 0.95; $^{13}\text{C}_\delta$ 22.9<br>$\text{C}_\delta\text{H}_3$ 0.96; $^{13}\text{C}_\delta$ 24.5           |
| Glu 7                                                                                                                                                                                                                                        | 8.38          | 60.6                   | 3.95                      | 29.7                  | 2.16, 2.28               | $\text{C}_{\gamma\gamma}\text{H}$ 2.30, 2.52; $^{13}\text{C}_\gamma$ 36.4                                                                                                                               |
| Val 8                                                                                                                                                                                                                                        | 8.09          | 66.8                   | 3.65                      | 32.2                  | 2.09                     | $\text{C}_\gamma\text{H}_3$ 0.79; $^{13}\text{C}_\gamma$ 20.7<br>$\text{C}_\gamma\text{H}_3$ 1.07; $^{13}\text{C}_\gamma$ 21.1                                                                          |
| His 9                                                                                                                                                                                                                                        | 7.87          | 60.8                   | 4.08                      | 28.2                  | 3.02, 3.21               | $\text{C}_{\delta 1}\text{H}$ 6.99<br>$\text{C}_{\epsilon 2}\text{H}$ 7.83                                                                                                                              |
| Leu 10                                                                                                                                                                                                                                       | 8.61          | 58.0                   | 4.15                      | 42.0                  | 1.55, 1.93               | $\text{C}_\gamma\text{H}$ 1.83; $^{13}\text{C}_\gamma$ 27.2<br>$\text{C}_\delta\text{H}_3$ 0.90; $^{13}\text{C}_\delta$ 22.7<br>$\text{C}_\delta\text{H}_3$ 0.91; $^{13}\text{C}_\delta$ 24.9           |
| Arg 11                                                                                                                                                                                                                                       | 7.96          | 58.8                   | 4.13                      | 30.1                  | 1.95, 1.95               | $\text{C}_{\gamma\gamma}\text{H}$ 1.71, 1.86; $^{13}\text{C}_\gamma$ 28.0<br>$\text{C}_{\delta\delta}\text{H}$ 3.18, 3.18; $^{13}\text{C}_\delta$ 43.4<br>$\text{N}_\epsilon\text{H}$ 7.48              |
| Leu 12                                                                                                                                                                                                                                       | 7.94          | 56.7                   | 4.24                      | 42.5                  | 1.53, 1.78               | $\text{C}_\gamma\text{H}$ 1.80; $^{13}\text{C}_\gamma$ 27.0<br>$\text{C}_\delta\text{H}_3$ 0.79; $^{13}\text{C}_\delta$ 22.5<br>$\text{C}_\delta\text{H}_3$ 0.84; $^{13}\text{C}_\delta$ 25.1           |
| Ala13                                                                                                                                                                                                                                        | 7.80          | 53.2                   | 4.22                      | 19.1                  | 1.43                     |                                                                                                                                                                                                         |
| CONH <sub>2</sub>                                                                                                                                                                                                                            | 6.91,<br>7.13 |                        |                           |                       |                          |                                                                                                                                                                                                         |

**Table ST7.**  $^1\text{H}$ , and  $^{13}\text{C}$  chemical shifts (ppm, from DSS) for compound **7** in 30% TFE at 25°C.

| <b>Ac-Asp<sup>1</sup>-Leu<sup>2</sup>-Arg<sup>3</sup>-Ala<sup>4</sup>-Phe<sup>5</sup>-Leu<sup>6</sup>-Glu<sup>7</sup>-Gln<sup>8</sup>-His<sup>9</sup>-Leu<sup>10</sup>-Arg<sup>11</sup>-Ser<sup>12</sup>-Ala<sup>13</sup>-NH<sub>2</sub></b> |               |                        |                           |                       |                          |                                                                                                                                                                                               |
|----------------------------------------------------------------------------------------------------------------------------------------------------------------------------------------------------------------------------------------------|---------------|------------------------|---------------------------|-----------------------|--------------------------|-----------------------------------------------------------------------------------------------------------------------------------------------------------------------------------------------|
| Residue                                                                                                                                                                                                                                      | HN            | $^{13}\text{C}_\alpha$ | $\text{C}_\alpha\text{H}$ | $^{13}\text{C}_\beta$ | $\text{C}_\beta\text{H}$ | Others                                                                                                                                                                                        |
| CH <sub>3</sub> CO                                                                                                                                                                                                                           |               |                        |                           |                       |                          | CH <sub>3</sub> 2.04; $^{13}\text{C}$ 24.6                                                                                                                                                    |
| Asp 1                                                                                                                                                                                                                                        | 7.82          | nd                     | 4.69                      | 41.8                  | 2.68, 2.88               |                                                                                                                                                                                               |
| Leu 2                                                                                                                                                                                                                                        | 8.20          | 57.9                   | 4.24                      | 42.5                  | 1.66, 1.77               | $\text{C}_\gamma\text{H}$ 1.73; $^{13}\text{C}_\gamma$ 27.3<br>$\text{C}_\delta\text{H}_3$ 0.90; $^{13}\text{C}_\delta$ 23.4<br>$\text{C}_\delta\text{H}_3$ 0.97; $^{13}\text{C}_\delta$ 24.3 |
| Arg 3                                                                                                                                                                                                                                        | 8.14          | 60.4                   | 3.97                      | 29.8                  | 1.98, 1.98               | $\text{C}_{\gamma\gamma'}\text{H}$ 1.68, 1.77; $^{13}\text{C}_\gamma$ 27.4<br>$\text{C}_{\delta\delta'}\text{H}$ 3.25, 3.25; $^{13}\text{C}_\delta$ 43.6<br>$\text{N}_\epsilon\text{H}$ 7.66  |
| Ala 4                                                                                                                                                                                                                                        | 7.87          | 55.3                   | 4.19                      | 18.2                  | 1.51                     |                                                                                                                                                                                               |
| Phe 5                                                                                                                                                                                                                                        | 8.01          | 61.6                   | 4.33                      | 39.4                  | 3.27, 3.38               | $\text{C}_{\delta\delta'}\text{H}$ 7.23, 7.23<br>$\text{C}_{\epsilon\epsilon'}\text{H}$ 7.14, 7.14<br>$\text{C}_\zeta\text{H}$ ----                                                           |
| Leu 6                                                                                                                                                                                                                                        | 8.85          | 58.9                   | 4.05                      | 41.9                  | 1.63, 2.01               | $\text{C}_\gamma\text{H}$ 1.97; $^{13}\text{C}_\gamma$ 27.2<br>$\text{C}_\delta\text{H}_3$ 0.95; $^{13}\text{C}_\delta$ 22.7<br>$\text{C}_\delta\text{H}_3$ 0.96; $^{13}\text{C}_\delta$ 24.6 |
| Glu 7                                                                                                                                                                                                                                        | 8.66          | 60.4                   | 3.95                      | 29.5                  | 2.12, 2.22               | $\text{C}_{\gamma\gamma'}\text{H}$ 2.29, 2.53; $^{13}\text{C}_\gamma$ 36.5                                                                                                                    |
| Gln 8                                                                                                                                                                                                                                        | 7.97          | 58.8                   | 4.03                      | 28.6                  | 2.07, 2.14               | $\text{C}_{\gamma\gamma'}\text{H}$ 2.36, 2.46; $^{13}\text{C}_\gamma$ 34.0<br>$\text{N}_{\epsilon\epsilon'}\text{H}_2$ 6.70, 7.40                                                             |
| His 9                                                                                                                                                                                                                                        | 8.02          | 59.5                   | 4.27                      | 28.6                  | 2.98, 3.26               | $\text{C}_{\delta 1}\text{H}$ 6.98<br>$\text{C}_{\epsilon 2}\text{H}$ 8.02                                                                                                                    |
| Leu 10                                                                                                                                                                                                                                       | 8.53          | 57.7                   | 4.18                      | 42.1                  | 1.58, 1.88               | $\text{C}_\gamma\text{H}$ 1.82; $^{13}\text{C}_\gamma$ 27.3<br>$\text{C}_\delta\text{H}_3$ 0.90; $^{13}\text{C}_\delta$ 22.7<br>$\text{C}_\delta\text{H}_3$ 0.91; $^{13}\text{C}_\delta$ 24.9 |
| Arg 11                                                                                                                                                                                                                                       | 8.01          | 58.3                   | 4.19                      | 30.6                  | 1.92, 1.92               | $\text{C}_{\gamma\gamma'}\text{H}$ 1.69, 1.83; $^{13}\text{C}_\gamma$ 27.9<br>$\text{C}_{\delta\delta'}\text{H}$ 3.20, 3.20; $^{13}\text{C}_\delta$ 43.7<br>$\text{N}_\epsilon\text{H}$ 7.44  |
| Ser 12                                                                                                                                                                                                                                       | 7.78          | 59.7                   | 4.39                      | 64.0                  | 3.93, 3.97               |                                                                                                                                                                                               |
| Ala13                                                                                                                                                                                                                                        | 7.83          | 53.0                   | 4.28                      | 19.3                  | 1.43                     |                                                                                                                                                                                               |
| CONH <sub>2</sub>                                                                                                                                                                                                                            | 6.95,<br>7.28 |                        |                           |                       |                          |                                                                                                                                                                                               |

**Table ST8.**  $^1\text{H}$ , and  $^{13}\text{C}$  chemical shifts (ppm, from DSS) for compound **8** in 30% TFE at 25°C.

| <b>Ac-Ser<sup>1</sup>-Val<sup>2</sup>-Arg<sup>3</sup>-Arg<sup>4</sup>-Phe<sup>5</sup>-Leu<sup>6</sup>-Glu<sup>7</sup>-Ala<sup>8</sup>-His<sup>9</sup>-Leu<sup>10</sup>-Arg<sup>11</sup>-Leu<sup>12</sup>-Ala<sup>13</sup>-NH<sub>2</sub></b> |               |                        |                           |                       |                          |                                                                                                                                                                                                   |
|----------------------------------------------------------------------------------------------------------------------------------------------------------------------------------------------------------------------------------------------|---------------|------------------------|---------------------------|-----------------------|--------------------------|---------------------------------------------------------------------------------------------------------------------------------------------------------------------------------------------------|
| Residue                                                                                                                                                                                                                                      | HN            | $^{13}\text{C}_\alpha$ | $\text{C}_\alpha\text{H}$ | $^{13}\text{C}_\beta$ | $\text{C}_\beta\text{H}$ | Others                                                                                                                                                                                            |
| CH <sub>3</sub> CO                                                                                                                                                                                                                           |               |                        |                           |                       |                          | CH <sub>3</sub> 2.13; $^{13}\text{C}$ 24.7                                                                                                                                                        |
| Ser 1                                                                                                                                                                                                                                        | 8.02          | 59.2                   | 4.47                      | 64.0                  | 3.93, 4.03               |                                                                                                                                                                                                   |
| Val 2                                                                                                                                                                                                                                        | 8.28          | 66.0                   | 3.93                      | 32.0                  | 2.15                     | $\text{C}_\gamma\text{H}_3$ 1.02; $^{13}\text{C}_\gamma$ 20.5<br>$\text{C}_\gamma'\text{H}_3$ 1.08; $^{13}\text{C}_\gamma'$ 22.4                                                                  |
| Arg 3                                                                                                                                                                                                                                        | 7.98          | 60.1                   | 4.03                      | 30.2                  | 1.88, 1.92               | $\text{C}_{\gamma\gamma'}\text{H}$ 1.67, 1.74; $^{13}\text{C}_\gamma$ nd<br>$\text{C}_{\delta\delta'}\text{H}$ 3.23, 3.23; $^{13}\text{C}_\delta$ 43.6<br>$\text{N}_\epsilon\text{H}$ 7.45        |
| Arg 4                                                                                                                                                                                                                                        | 7.86          | 59.4                   | 4.17                      | 30.3                  | 1.94, 1.94               | $\text{C}_{\gamma\gamma'}\text{H}$ 1.70, 1.77; $^{13}\text{C}_\gamma$ 27.4<br>$\text{C}_{\delta\delta'}\text{H}$ 3.24, 3.24; $^{13}\text{C}_\delta$ 43.6<br>$\text{N}_\epsilon\text{H}$ 7.28      |
| Phe 5                                                                                                                                                                                                                                        | 7.18          | 61.6                   | 4.37                      | 39.4                  | 3.28, 3.41               | $\text{C}_{\delta\delta'}\text{H}$ 7.25, 7.25<br>$\text{C}_{\epsilon\epsilon'}\text{H}$ 7.18, 7.18<br>$\text{C}_\zeta\text{H}$ ----                                                               |
| Leu 6                                                                                                                                                                                                                                        | 8.73          | 59.0                   | 4.10                      | 42.1                  | 1.68, 1.98               | $\text{C}_\gamma\text{H}$ 1.94; $^{13}\text{C}_\gamma$ 27.2<br>$\text{C}_\delta\text{H}_3$ 0.94; $^{13}\text{C}_\delta$ 22.8<br>$\text{C}_\delta'\text{H}_3$ 0.95; $^{13}\text{C}_{\delta'}$ 24.6 |
| Glu 7                                                                                                                                                                                                                                        | 8.64          | 60.3                   | 3.92                      | 29.7                  | 2.10, 2.23               | $\text{C}_{\gamma\gamma'}\text{H}$ 2.28, 2.58; $^{13}\text{C}_\gamma$ 37.0                                                                                                                        |
| Ala 8                                                                                                                                                                                                                                        | 7.98          | 55.1                   | 4.09                      | 18.0                  | 1.45                     |                                                                                                                                                                                                   |
| His 9                                                                                                                                                                                                                                        | 7.89          | 59.9                   | 4.19                      | 28.5                  | 3.04, 3.26               | $\text{C}_{\delta 1}\text{H}$ 7.02<br>$\text{C}_{\epsilon 2}\text{H}$ 7.75                                                                                                                        |
| Leu 10                                                                                                                                                                                                                                       | 8.42          | 57.8                   | 4.17                      | 42.1                  | 1.58, 1.91               | $\text{C}_\gamma\text{H}$ 1.83; $^{13}\text{C}_\gamma$ 27.2<br>$\text{C}_\delta\text{H}_3$ 0.90; $^{13}\text{C}_\delta$ 22.7<br>$\text{C}_\delta'\text{H}_3$ 0.92; $^{13}\text{C}_{\delta'}$ 24.9 |
| Arg 11                                                                                                                                                                                                                                       | 7.97          | 58.4                   | 4.15                      | 30.3                  | 1.92, 1.92               | $\text{C}_{\gamma\gamma'}\text{H}$ 1.67, 1.81; $^{13}\text{C}_\gamma$ 27.9<br>$\text{C}_{\delta\delta'}\text{H}$ 3.21, 3.21; $^{13}\text{C}_\delta$ 43.7<br>$\text{N}_\epsilon\text{H}$ 7.37      |
| Leu 12                                                                                                                                                                                                                                       | 7.73          | 56.4                   | 4.26                      | 42.5                  | 1.59, 1.77               | $\text{C}_\gamma\text{H}$ 1.57; $^{13}\text{C}_\gamma$ 27.2<br>$\text{C}_\delta\text{H}_3$ 0.88; $^{13}\text{C}_\delta$ 22.9<br>$\text{C}_\delta'\text{H}_3$ 0.88; $^{13}\text{C}_{\delta'}$ 24.8 |
| Ala13                                                                                                                                                                                                                                        | 7.79          | 53.1                   | 4.24                      | 19.2                  | 1.43                     |                                                                                                                                                                                                   |
| CONH <sub>2</sub>                                                                                                                                                                                                                            | 6.90,<br>7.19 |                        |                           |                       |                          |                                                                                                                                                                                                   |

**Table ST9.**  $^1\text{H}$ , and  $^{13}\text{C}$  chemical shifts (ppm, from DSS) for compound **15** in 30%TFE at 25°C.

| <b>Ac-Glu<sup>1</sup>-Val<sup>2</sup>-Glu<sup>3</sup>-Lys<sup>4</sup>-Phe<sup>5</sup>-Met(O<sub>2</sub>)<sup>6</sup>-Lys<sup>7</sup>-Val<sup>8</sup>-Tyr<sup>9</sup>-Gln<sup>10</sup>-Arg<sup>11</sup>-Ser<sup>12</sup>-Tyr<sup>13</sup>-NH<sub>2</sub></b> |               |                        |                           |                       |                          |                                                                                                                                                                                                                                              |
|-------------------------------------------------------------------------------------------------------------------------------------------------------------------------------------------------------------------------------------------------------------|---------------|------------------------|---------------------------|-----------------------|--------------------------|----------------------------------------------------------------------------------------------------------------------------------------------------------------------------------------------------------------------------------------------|
| Residue                                                                                                                                                                                                                                                     | HN            | $^{13}\text{C}_\alpha$ | $\text{C}_\alpha\text{H}$ | $^{13}\text{C}_\beta$ | $\text{C}_\beta\text{H}$ | Others                                                                                                                                                                                                                                       |
| CH <sub>3</sub> CO                                                                                                                                                                                                                                          |               |                        |                           |                       |                          | CH <sub>3</sub> 2.14; $^{13}\text{C}$ 24.5                                                                                                                                                                                                   |
| Glu 1                                                                                                                                                                                                                                                       | 8.41          | 58.3                   | 4.23                      | 29.7                  | 2.01, 2.14               | $\text{C}_{\gamma\gamma'}\text{H}$ 2.36, 2.36; $^{13}\text{C}_\gamma$ 36.2                                                                                                                                                                   |
| Val 2                                                                                                                                                                                                                                                       | 8.12          | 65.7                   | 3.85                      | 31.8                  | 2.12                     | $\text{C}_\gamma\text{H}_3$ 1.02; $^{13}\text{C}_\gamma$ 20.9<br>$\text{C}_\gamma'\text{H}_3$ 1.06; $^{13}\text{C}_\gamma'$ 21.5                                                                                                             |
| Glu 3                                                                                                                                                                                                                                                       | 8.45          | 59.6                   | 4.14                      | 29.2                  | 2.04, 2.11               | $\text{C}_{\gamma\gamma'}\text{H}$ 2.33, 2.33; $^{13}\text{C}_\gamma$ 36.6                                                                                                                                                                   |
| Lys 4                                                                                                                                                                                                                                                       | 7.81          | 59.5                   | 4.02                      | 32.4                  | 1.89, 1.89               | $\text{C}_{\gamma\gamma'}\text{H}$ 1.34, 1.49; $^{13}\text{C}_\gamma$ 25.0<br>$\text{C}_{\delta\delta'}\text{H}$ 1.69, 1.69; $^{13}\text{C}_\delta$ 29.4<br>$\text{C}_{\epsilon\epsilon'}\text{H}$ 2.92, 2.92; $^{13}\text{C}_\epsilon$ 42.1 |
| Phe 5                                                                                                                                                                                                                                                       | 8.15          | nd                     | 4.32                      | 38.8                  | 3.25, 3.25               | $\text{C}_{\delta\delta'}\text{H}$ 7.22, 7.22<br>$\text{C}_{\epsilon\epsilon'}\text{H}$ 7.25, 7.25<br>$\text{C}_t\text{H}$ 7.35                                                                                                              |
| Met(O <sub>2</sub> ) 6                                                                                                                                                                                                                                      | 8.48          | 58.0                   | 4.15                      | 25.6                  | 2.40, 2.50               | $\text{C}_{\gamma\gamma'}\text{H}$ 3.27, 3.57; $^{13}\text{C}_\gamma$ 53.3<br>$\text{C}_\epsilon\text{H}_3$ 3.01; $^{13}\text{C}_\epsilon$ 42.6                                                                                              |
| Lys 7                                                                                                                                                                                                                                                       | 7.99          | 58.9                   | 4.16                      | 32.5                  | 1.90, 2.01               | $\text{C}_{\gamma\gamma'}\text{H}$ 1.49, 1.66; $^{13}\text{C}_\gamma$ 25.4<br>$\text{C}_{\delta\delta'}\text{H}$ 1.70, 1.70; $^{13}\text{C}_\delta$ 29.1<br>$\text{C}_{\epsilon\epsilon'}\text{H}$ 2.98, 2.98; $^{13}\text{C}_\epsilon$ 42.2 |
| Val 8                                                                                                                                                                                                                                                       | 7.98          | 65.5                   | 3.75                      | 32.1                  | 2.07                     | $\text{C}_\gamma\text{H}_3$ 0.81; $^{13}\text{C}_\gamma$ 20.6<br>$\text{C}_\gamma'\text{H}_3$ 1.00; $^{13}\text{C}_\gamma'$ 21.5                                                                                                             |
| Tyr 9                                                                                                                                                                                                                                                       | 8.38          | 60.6                   | 4.20                      | 38.4                  | 2.72, 2.97               | $\text{C}_{\delta\delta'}\text{H}$ 7.00, 7.00<br>$\text{C}_{\epsilon\epsilon'}\text{H}$ 6.74, 6.74                                                                                                                                           |
| Gln 10                                                                                                                                                                                                                                                      | 8.12          | 57.7                   | 4.11                      | 28.8                  | 2.17, 2.17               | $\text{C}_{\gamma\gamma'}\text{H}$ 2.41, 2.52; $^{13}\text{C}_\gamma$ 34.0<br>$\text{N}_{\epsilon\epsilon'}\text{H}_2$ 6.72, 7.32                                                                                                            |
| Arg 11                                                                                                                                                                                                                                                      | 7.91          | 57.2                   | 4.23                      | 30.4                  | 1.87, 1.90               | $\text{C}_{\gamma\gamma'}\text{H}$ 1.70, 1.70; $^{13}\text{C}_\gamma$ 27.1<br>$\text{C}_{\delta\delta'}\text{H}$ 3.19, 3.19; $^{13}\text{C}_\delta$ 43.3<br>$\text{N}_\epsilon\text{H}$ 7.20                                                 |
| Ser 12                                                                                                                                                                                                                                                      | 7.95          | 59.6                   | 4.33                      | 63.8                  | 3.61, 3.72               |                                                                                                                                                                                                                                              |
| Tyr 13                                                                                                                                                                                                                                                      | 7.93          | nd                     | 4.48                      | 39.0                  | 2.65, 3.03               | $\text{C}_{\delta\delta'}\text{H}$ 7.01, 7.01<br>$\text{C}_{\epsilon\epsilon'}\text{H}$ 6.78, 6.78                                                                                                                                           |
| CONH <sub>2</sub>                                                                                                                                                                                                                                           | 6.97,<br>7.28 |                        |                           |                       |                          |                                                                                                                                                                                                                                              |

**Table ST10.**  $^1\text{H}$ , and  $^{13}\text{C}$  chemical shifts (ppm, from DSS) for compound **16** in 30%TFE at 25°C

| <b>Ac-Glu<sup>1</sup>-Val<sup>2</sup>-c<sup>3-7</sup>[Glu<sup>3</sup>-Lys<sup>4</sup>-Phe<sup>5</sup>-Met(O<sub>2</sub>)<sup>6</sup>-Lys<sup>7</sup>]-Val<sup>8</sup>-Tyr<sup>9</sup>-Gln<sup>10</sup>-Arg<sup>11</sup>-Ser<sup>12</sup>-Tyr<sup>13</sup>-NH<sub>2</sub></b> |               |                        |                           |                       |                          |                                                                                                                                                                                                                                                                               |
|------------------------------------------------------------------------------------------------------------------------------------------------------------------------------------------------------------------------------------------------------------------------------|---------------|------------------------|---------------------------|-----------------------|--------------------------|-------------------------------------------------------------------------------------------------------------------------------------------------------------------------------------------------------------------------------------------------------------------------------|
| Residue                                                                                                                                                                                                                                                                      | HN            | $^{13}\text{C}_\alpha$ | $\text{C}_\alpha\text{H}$ | $^{13}\text{C}_\beta$ | $\text{C}_\beta\text{H}$ | Others                                                                                                                                                                                                                                                                        |
| CH <sub>3</sub> CO                                                                                                                                                                                                                                                           |               |                        |                           |                       |                          | CH <sub>3</sub> 2.17; $^{13}\text{C}$ 24.7                                                                                                                                                                                                                                    |
| Glu 1                                                                                                                                                                                                                                                                        | 8.46          | 57.9                   | 4.19                      | 29.4                  | 2.03, 2.13               | $\text{C}_{\gamma\gamma'}\text{H}$ 2.42, 2.42; $^{13}\text{C}_\gamma$ 36.2                                                                                                                                                                                                    |
| Val 2                                                                                                                                                                                                                                                                        | 8.03          | 66.3                   | 3.82                      | 32.2                  | 2.10                     | $\text{C}_\gamma\text{H}_3$ 1.02; $^{13}\text{C}_\gamma$ 21.0<br>$\text{C}_\gamma'\text{H}_3$ 1.07; $^{13}\text{C}_{\gamma'}$ 22.0                                                                                                                                            |
| Glu 3                                                                                                                                                                                                                                                                        | 7.88          | 60.6                   | 4.10                      | 27.5                  | 1.94, 2.44               | $\text{C}_{\gamma\gamma'}\text{H}$ 2.41, 2.60; $^{13}\text{C}_\gamma$ 34.9                                                                                                                                                                                                    |
| Lys 4                                                                                                                                                                                                                                                                        | 7.56          | 60.1                   | 3.86                      | 32.3                  | 1.90, 1.96               | $\text{C}_{\gamma\gamma'}\text{H}$ 1.46, 1.61; $^{13}\text{C}_\gamma$ 25.5<br>$\text{C}_{\delta\delta'}\text{H}$ 1.73, 1.73; $^{13}\text{C}_\delta$ 29.4<br>$\text{C}_{\epsilon\epsilon'}\text{H}$ 2.99, 2.99; $^{13}\text{C}_\epsilon$ 42.5                                  |
| Phe 5                                                                                                                                                                                                                                                                        | 8.14          | 61.5                   | 4.25                      | 38.8                  | 3.26, 3.26               | $\text{C}_{\delta\delta'}\text{H}$ 7.18, 7.18<br>$\text{C}_{\epsilon\epsilon'}\text{H}$ 7.23, 7.23<br>$\text{C}_\zeta\text{H}$ 7.24                                                                                                                                           |
| Met(O <sub>2</sub> ) 6                                                                                                                                                                                                                                                       | 8.46          | 60.6                   | 4.04                      | 25.3                  | 2.45, 2.70               | $\text{C}_{\gamma\gamma'}\text{H}$ 3.28, 3.71; $^{13}\text{C}_\gamma$ 53.6<br>$\text{C}_\epsilon\text{H}_3$ 3.01; $^{13}\text{C}_\epsilon$ 42.9                                                                                                                               |
| Lys 7                                                                                                                                                                                                                                                                        | 7.97          | 59.0                   | 4.04                      | 33.7                  | 1.87, 1.92               | $\text{C}_{\gamma\gamma'}\text{H}$ 1.24, 1.94; $^{13}\text{C}_\gamma$ 26.6<br>$\text{C}_{\delta\delta'}\text{H}$ 1.43, 1.57; $^{13}\text{C}_\delta$ 31.0<br>$\text{C}_{\epsilon\epsilon'}\text{H}$ 2.69, 3.57; $^{13}\text{C}_\epsilon$ 42.6<br>$\text{N}_\zeta\text{H}$ 7.57 |
| Val 8                                                                                                                                                                                                                                                                        | 8.10          | 66.6                   | 3.63                      | 32.0                  | 2.10                     | $\text{C}_\gamma\text{H}_3$ 0.83; $^{13}\text{C}_\gamma$ 20.9<br>$\text{C}_\gamma'\text{H}_3$ 1.05; $^{13}\text{C}_{\gamma'}$ 22.2                                                                                                                                            |
| Tyr 9                                                                                                                                                                                                                                                                        | 8.63          | 61.9                   | 4.07                      | 38.6                  | 2.69, 2.98               | $\text{C}_{\delta\delta'}\text{H}$ 6.99, 6.99<br>$\text{C}_{\epsilon\epsilon'}\text{H}$ 6.72, 6.72                                                                                                                                                                            |
| Gln 10                                                                                                                                                                                                                                                                       | 8.30          | 58.6                   | 4.06                      | 28.8                  | 2.21, 2.25               | $\text{C}_{\gamma\gamma'}\text{H}$ 2.47, 2.59; $^{13}\text{C}_\gamma$ 34.4<br>$\text{N}_{\epsilon\epsilon'}\text{H}_2$ 6.68, 7.29                                                                                                                                             |
| Arg 11                                                                                                                                                                                                                                                                       | 7.88          | 58.8                   | 4.19                      | 30.4                  | 1.91, 1.95               | $\text{C}_{\gamma\gamma'}\text{H}$ 1.72, 1.76; $^{13}\text{C}_\gamma$ 27.4<br>$\text{C}_{\delta\delta'}\text{H}$ 3.19, 3.19; $^{13}\text{C}_\delta$ 43.5<br>$\text{N}_\epsilon\text{H}$ 7.21                                                                                  |
| Ser 12                                                                                                                                                                                                                                                                       | 7.89          | 60.4                   | 4.29                      | 64.0                  | 3.53, 3.67               |                                                                                                                                                                                                                                                                               |
| Tyr 13                                                                                                                                                                                                                                                                       | 7.90          | 58.6                   | 4.45                      | 39.2                  | 2.54, 3.01               | $\text{C}_{\delta\delta'}\text{H}$ 6.95, 6.95<br>$\text{C}_{\epsilon\epsilon'}\text{H}$ 6.75, 6.75                                                                                                                                                                            |
| CONH <sub>2</sub>                                                                                                                                                                                                                                                            | 6.96,<br>7.26 |                        |                           |                       |                          |                                                                                                                                                                                                                                                                               |

**Table ST11.**  $^1\text{H}$ , and  $^{13}\text{C}$  chemical shifts (ppm, from DSS) for compound **17** in 30%TFE at 25°C

| <b>Ac-Glu<sup>1</sup>-Val<sup>2</sup>-Val<sup>3</sup>-Lys<sup>4</sup>-Phe<sup>5</sup>-Met(O<sub>2</sub>)<sup>6</sup>-Glu<sup>7</sup>-Val<sup>8</sup>-Tyr<sup>9</sup>-Gln<sup>10</sup>-Lys<sup>11</sup>-Ser<sup>12</sup>-Tyr<sup>13</sup>-NH<sub>2</sub></b> |               |                        |                           |                       |                          |                                                                                                                                                                                     |
|-------------------------------------------------------------------------------------------------------------------------------------------------------------------------------------------------------------------------------------------------------------|---------------|------------------------|---------------------------|-----------------------|--------------------------|-------------------------------------------------------------------------------------------------------------------------------------------------------------------------------------|
| Residue                                                                                                                                                                                                                                                     | HN            | $^{13}\text{C}_\alpha$ | $\text{C}_\alpha\text{H}$ | $^{13}\text{C}_\beta$ | $\text{C}_\beta\text{H}$ | Others                                                                                                                                                                              |
| CH <sub>3</sub> CO                                                                                                                                                                                                                                          |               |                        |                           |                       |                          | CH <sub>3</sub> 2.10, $^{13}\text{C}$ 24.3                                                                                                                                          |
| Glu 1                                                                                                                                                                                                                                                       | 8.44          |                        | 4.18                      |                       | 1.99, 2.08               | $\text{C}_{\gamma\gamma'}\text{H}$ 2.34, 2.34                                                                                                                                       |
| Val 2                                                                                                                                                                                                                                                       | 8.07          |                        | 3.97                      |                       | 2.13                     | $\text{C}_\gamma\text{H}_3$ 1.00; $^{13}\text{C}_\gamma$ 20.7<br>$\text{C}_\gamma'\text{H}_3$ 1.05; $^{13}\text{C}_{\gamma'}$ 21.1                                                  |
| Val 3                                                                                                                                                                                                                                                       | 7.62          |                        | 3.96                      |                       | 2.12                     | $\text{C}_\gamma\text{H}_3$ 0.98; $^{13}\text{C}_\gamma$ 20.9<br>$\text{C}_\gamma'\text{H}_3$ 1.03; $^{13}\text{C}_{\gamma'}$ 21.5                                                  |
| Lys 4                                                                                                                                                                                                                                                       | 7.78          |                        | 4.21                      |                       | 1.88, 1.88               | $\text{C}_{\gamma\gamma'}\text{H}$ 1.42, 1.47<br>$\text{C}_{\delta\delta'}\text{H}$ 1.70, 1.70<br>$\text{C}_{\epsilon\epsilon'}\text{H}$ 2.94, 2.94; $^{13}\text{C}_\epsilon$ 42.0  |
| Phe 5                                                                                                                                                                                                                                                       | 8.16          |                        | 4.36                      |                       | 3.21, 3.21               | $\text{C}_{\delta\delta'}\text{H}$ 7.21, 7.21<br>$\text{C}_{\epsilon\epsilon'}\text{H}$ 7.28, 7.28<br>$\text{C}_\zeta\text{H}$ 7.30                                                 |
| Met(O <sub>2</sub> ) 6                                                                                                                                                                                                                                      | 8.36          |                        | 4.16                      |                       | 2.39, 2.52               | $\text{C}_{\gamma\gamma'}\text{H}$ 3.26, 3.55<br>$\text{C}_\epsilon\text{H}_3$ 3.01; $^{13}\text{C}_\epsilon$ 42.5                                                                  |
| Glu 7                                                                                                                                                                                                                                                       | 8.20          |                        | 4.13                      |                       | 2.14, 2.23               | $\text{C}_{\gamma\gamma'}\text{H}$ 2.44, 2.44                                                                                                                                       |
| Val 8                                                                                                                                                                                                                                                       | 7.97          |                        | 3.73                      |                       | 2.10                     | $\text{C}_\gamma\text{H}_3$ 0.86; $^{13}\text{C}_\gamma$ 20.7<br>$\text{C}_\gamma'\text{H}_3$ 1.03; $^{13}\text{C}_{\gamma'}$ 21.6                                                  |
| Tyr 9                                                                                                                                                                                                                                                       | 8.41          |                        | 4.17                      |                       | 2.79, 3.00               | $\text{C}_{\delta\delta'}\text{H}$ 7.03, 7.03<br>$\text{C}_{\epsilon\epsilon'}\text{H}$ 6.75, 6.75                                                                                  |
| Gln 10                                                                                                                                                                                                                                                      | 8.24          |                        | 4.09                      |                       | 2.19, 2.19               | $\text{C}_{\gamma\gamma'}\text{H}$ 2.45, 2.54<br>$\text{N}_{\epsilon\epsilon'}\text{H}_2$ 6.73, 7.29                                                                                |
| Lys 11                                                                                                                                                                                                                                                      | 7.98          |                        | 4.19                      |                       | 1.88, 1.88               | $\text{C}_{\gamma\gamma'}\text{H}$ 1.47, 1.57;<br>$\text{C}_{\delta\delta'}\text{H}$ 1.69, 1.69<br>$\text{C}_{\epsilon\epsilon'}\text{H}$ 2.99, 2.99; $^{13}\text{C}_\epsilon$ 42.2 |
| Ser 12                                                                                                                                                                                                                                                      | 7.90          |                        | 4.30                      |                       | 3.57, 3.71               |                                                                                                                                                                                     |
| Tyr 13                                                                                                                                                                                                                                                      | 7.90          |                        | 4.46                      |                       | 2.60, 3.02               | $\text{C}_{\delta\delta'}\text{H}$ 6.99, 6.99<br>$\text{C}_{\epsilon\epsilon'}\text{H}$ 6.77, 6.77                                                                                  |
| CONH <sub>2</sub>                                                                                                                                                                                                                                           | 6.97,<br>7.30 |                        |                           |                       |                          |                                                                                                                                                                                     |

**Table ST12.** <sup>1</sup>H, and <sup>13</sup>C chemical shifts (ppm, from DSS) for compound **18** in 30%TFE at 25°C

| <b>Ac-Glu<sup>1</sup>-Val<sup>2</sup>-Val<sup>3</sup>-Lys<sup>4</sup>-Phe<sup>5</sup>-Met(O<sub>2</sub>)<sup>6</sup>-c<sup>7-11</sup>[Glu<sup>7</sup>-Val<sup>8</sup>-Tyr<sup>9</sup>-Gln<sup>10</sup>-Lys<sup>11</sup>]-Ser<sup>12</sup>-Tyr<sup>13</sup>-NH<sub>2</sub></b> |               |                              |                  |                              |                  |                                                                                                                                                                                                                                   |
|-------------------------------------------------------------------------------------------------------------------------------------------------------------------------------------------------------------------------------------------------------------------------------|---------------|------------------------------|------------------|------------------------------|------------------|-----------------------------------------------------------------------------------------------------------------------------------------------------------------------------------------------------------------------------------|
| Residue                                                                                                                                                                                                                                                                       | HN            | <sup>13</sup> C <sub>α</sub> | C <sub>α</sub> H | <sup>13</sup> C <sub>β</sub> | C <sub>β</sub> H | Others                                                                                                                                                                                                                            |
| CH <sub>3</sub> CO                                                                                                                                                                                                                                                            |               |                              |                  |                              |                  | CH <sub>3</sub> 1.96, <sup>13</sup> C 24.5                                                                                                                                                                                        |
| Glu 1                                                                                                                                                                                                                                                                         | 8.24          | 58.8                         | 3.98             | 29.3                         | 1.86, 1.92       | C <sub>γγ'</sub> H 2.24, 2.24; <sup>13</sup> C <sub>γ</sub> 35.2                                                                                                                                                                  |
| Val 2                                                                                                                                                                                                                                                                         | 7.80          | 65.7                         | 3.76             | 32.1                         | 1.97             | C <sub>γ</sub> H <sub>3</sub> 0.86; <sup>13</sup> C <sub>γ</sub> 20.8<br>C <sub>γ</sub> 'H <sub>3</sub> 0.91; <sup>13</sup> C <sub>γ</sub> ' 21.5                                                                                 |
| Val 3                                                                                                                                                                                                                                                                         | 7.28          | 65.8                         | 3.75             | 32.0                         | 1.98             | C <sub>γ</sub> H <sub>3</sub> 0.83; <sup>13</sup> C <sub>γ</sub> 20.9<br>C <sub>γ</sub> 'H <sub>3</sub> 0.88; <sup>13</sup> C <sub>γ</sub> ' 21.8                                                                                 |
| Lys 4                                                                                                                                                                                                                                                                         | 7.48          | 59.3                         | 4.03             | 32.5                         | 1.77, 1.77       | C <sub>γγ'</sub> H 1.28, 1.36; <sup>13</sup> C <sub>γ</sub> 25.1<br>C <sub>δδ'</sub> H 1.53, 1.65; <sup>13</sup> C <sub>δ</sub> 29.5<br>C <sub>εε'</sub> H 2.77, 2.77; <sup>13</sup> C <sub>ε</sub> 42.4                          |
| Phe 5                                                                                                                                                                                                                                                                         | 8.02          | 61.2                         | 4.16             | 38.9                         | 3.07, 3.07       | C <sub>δδ'</sub> H 7.02, 7.02<br>C <sub>εε'</sub> H 7.10, 7.10<br>C <sub>ζ</sub> H 7.07                                                                                                                                           |
| Met(O <sub>2</sub> ) 6                                                                                                                                                                                                                                                        | 8.22          | 58.8                         | 3.89             | 25.7                         | 2.23, 2.41       | C <sub>γγ'</sub> H 3.06, 3.48; <sup>13</sup> C <sub>γ</sub> 53.7<br>C <sub>ε</sub> H <sub>3</sub> 2.79; <sup>13</sup> C <sub>ε</sub> 42.7                                                                                         |
| Glu 7                                                                                                                                                                                                                                                                         | 8.00          | 61.3                         | 3.86             | 28.0                         | 1.86, 2.56       | C <sub>γγ'</sub> H 2.23, 2.37; <sup>13</sup> C <sub>γ</sub> 35.4                                                                                                                                                                  |
| Val 8                                                                                                                                                                                                                                                                         | 7.83          | 66.9                         | 3.35             | 32.0                         | 1.99             | C <sub>γ</sub> H <sub>3</sub> 0.78; <sup>13</sup> C <sub>γ</sub> 21.0<br>C <sub>γ</sub> 'H <sub>3</sub> 0.98; <sup>13</sup> C <sub>γ</sub> ' 22.7                                                                                 |
| Tyr 9                                                                                                                                                                                                                                                                         | 8.40          | nd                           | 3.82             | 38.5                         | 2.65, 2.93       | C <sub>δδ'</sub> H 6.85, 6.85<br>C <sub>εε'</sub> H 6.54, 6.54                                                                                                                                                                    |
| Gln 10                                                                                                                                                                                                                                                                        | 8.16          | 59.5                         | 3.83             | 28.6                         | 2.15, 2.21       | C <sub>γγ'</sub> H 2.34, 2.51; <sup>13</sup> C <sub>γ</sub> 34.5<br>N <sub>εε'</sub> H <sub>2</sub> 6.50, 7.06                                                                                                                    |
| Lys 11                                                                                                                                                                                                                                                                        | 7.87          | 60.0                         | 3.84             | 34.2                         | 1.61, 1.70       | C <sub>γγ'</sub> H 1.07, 1.74; <sup>13</sup> C <sub>γ</sub> 26.6<br>C <sub>δδ'</sub> H 1.28, 1.34; <sup>13</sup> C <sub>δ</sub> 30.9<br>C <sub>εε'</sub> H 2.53, 3.34; <sup>13</sup> C <sub>ε</sub> 42.4<br>N <sub>ζ</sub> H 7.34 |
| Ser 12                                                                                                                                                                                                                                                                        | 7.66          | 61.0                         | 4.02             | 64.0                         | 3.24, 3.47       |                                                                                                                                                                                                                                   |
| Tyr 13                                                                                                                                                                                                                                                                        | 7.76          | 58.9                         | 4.24             | 39.3                         | 2.22, 2.82       | C <sub>δδ'</sub> H 6.70, 6.70<br>C <sub>εε'</sub> H 6.54, 6.54                                                                                                                                                                    |
| CONH <sub>2</sub>                                                                                                                                                                                                                                                             | 6.78,<br>7.09 |                              |                  |                              |                  |                                                                                                                                                                                                                                   |



**Table ST13.** Structural statistics for the 20 lowest target function structures calculated for analogues **1-8, 15-18**.

| Peptide   | Restrains             |          | RMSD <sup>b</sup> |                 |
|-----------|-----------------------|----------|-------------------|-----------------|
|           | Distance <sup>a</sup> | Dihedral | Backbone atoms    | All heavy atoms |
| <b>1</b>  | 50                    | 24       | 0.4 ± 0.2         | 1.9 ± 0.2       |
| <b>2</b>  | 57                    | 24       | 0.2 ± 0.1         | 1.4 ± 0.2       |
| <b>3</b>  | 25                    | 23       | 0.4 ± 0.1         | 1.6 ± 0.2       |
| <b>4</b>  | 38                    | 23       | 0.4 ± 0.1         | 1.6 ± 0.2       |
| <b>5</b>  | 31                    | 20       | 0.3 ± 0.2         | 1.6 ± 0.2       |
| <b>6</b>  | 62                    | 22       | 0.1 ± 0.1         | 1.8 ± 0.3       |
| <b>7</b>  | 64                    | 22       | 0.1 ± 0.1         | 1.5 ± 0.2       |
| <b>8</b>  | 59                    | 22       | 0.1 ± 0.1         | 1.6 ± 0.2       |
| <b>15</b> | 42                    | 24       | 0.5 ± 0.3         | 1.8 ± 0.3       |
| <b>16</b> | 54                    | 22       | 0.2 ± 0.1         | 1.5 ± 0.2       |
| <b>17</b> | 16                    | 24       | 0.5 ± 0.2         | 1.7 ± 0.2       |
| <b>18</b> | 55                    | 22       | 0.2 ± 0.2         | 1.2 ± 0.2       |

<sup>a</sup>Non-sequential and the sequential amide – amide ( $d_{NN(i,i+1)}$ ). <sup>b</sup>Excluding N- and C-terminal residues

**Figure S1:** CD graphics in A) H<sub>2</sub>O and B) 30% TFE/H<sub>2</sub>O, for VEGF<sub>13-25</sub> analogues 1-4.

A)

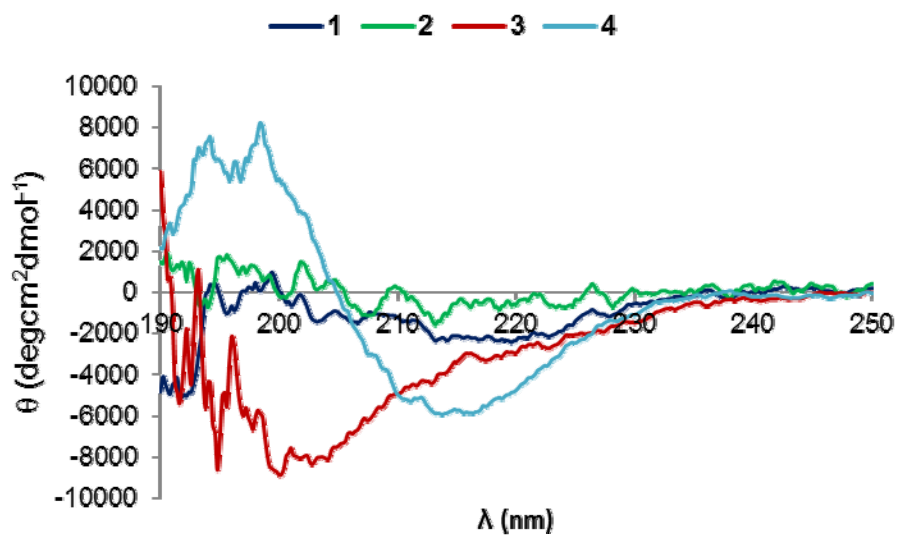

B)

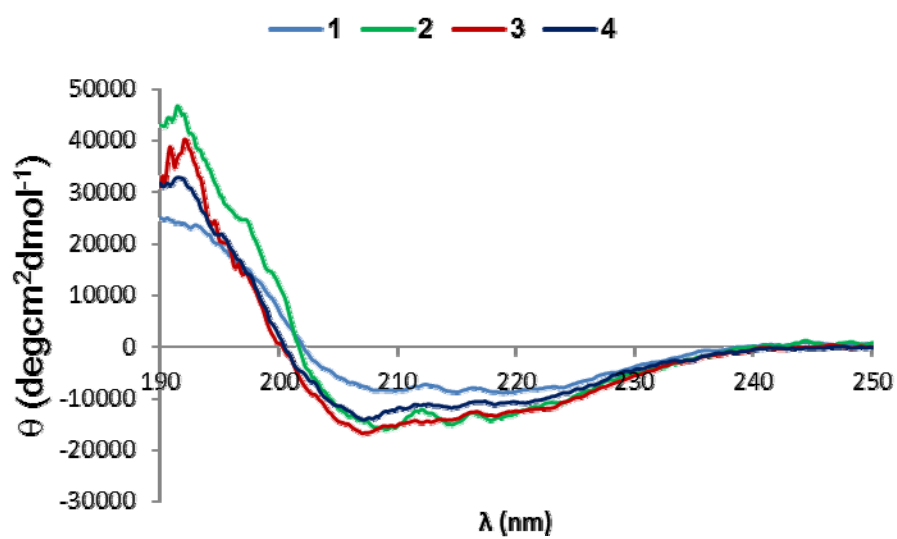

**Figure S2:** CD graphics in A) H<sub>2</sub>O and B) 30% TFE/H<sub>2</sub>O, for Vammin<sub>1-13</sub> analogues 5-8.

A)

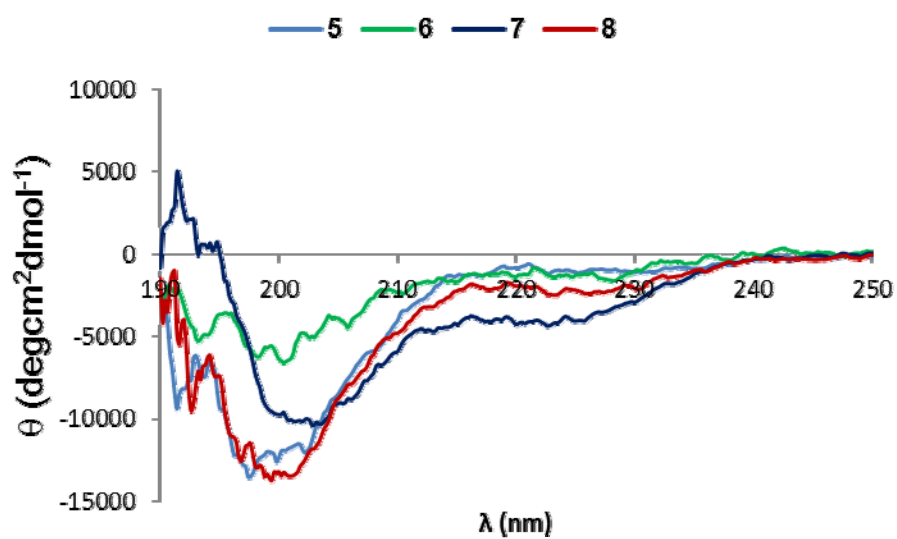

B)

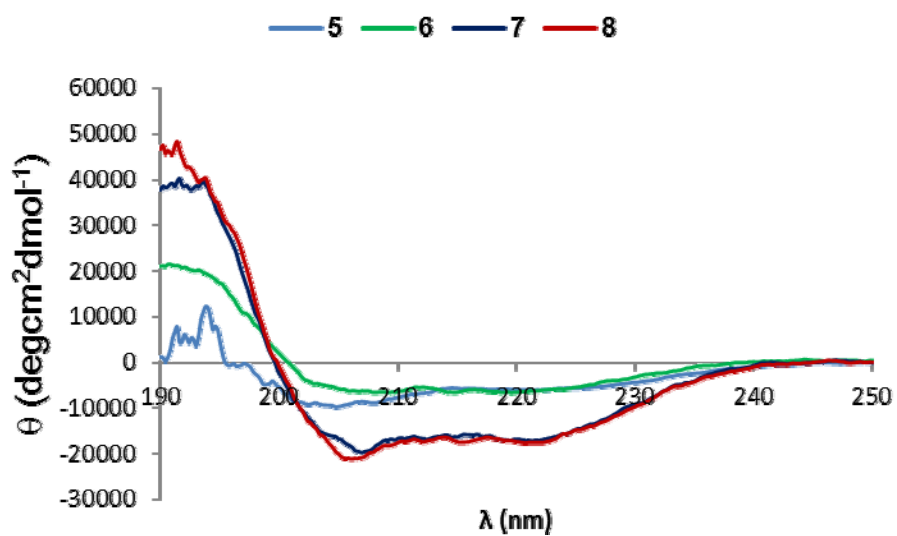

**Figure S3:** CD graphics in A) H<sub>2</sub>O and B) 30% TFE/H<sub>2</sub>O, for VEGF<sub>13-25</sub> analogues **15-18**.

**A)**

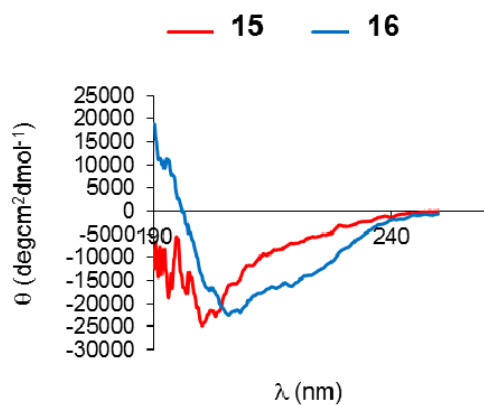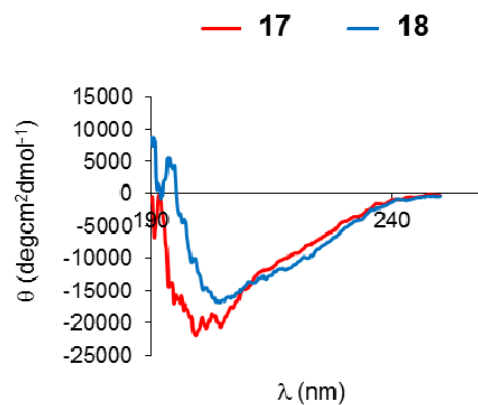

**B)**

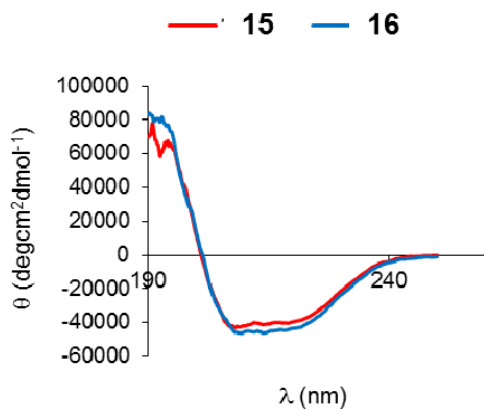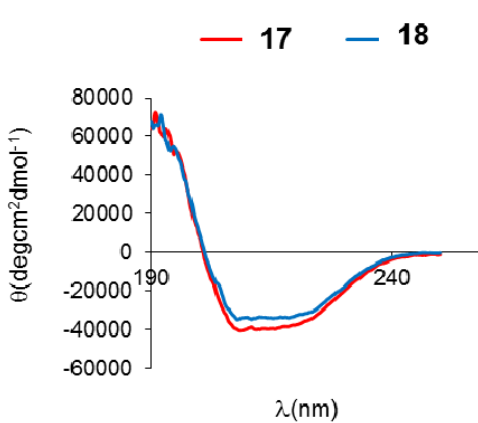



**Figure S5.**  $\Delta\delta_{C\alpha}$  observed for Vammin<sub>1-13</sub> analogues **5-8**. Missing bars correspond to residues whose C $\alpha$  chemical shift was not assigned.

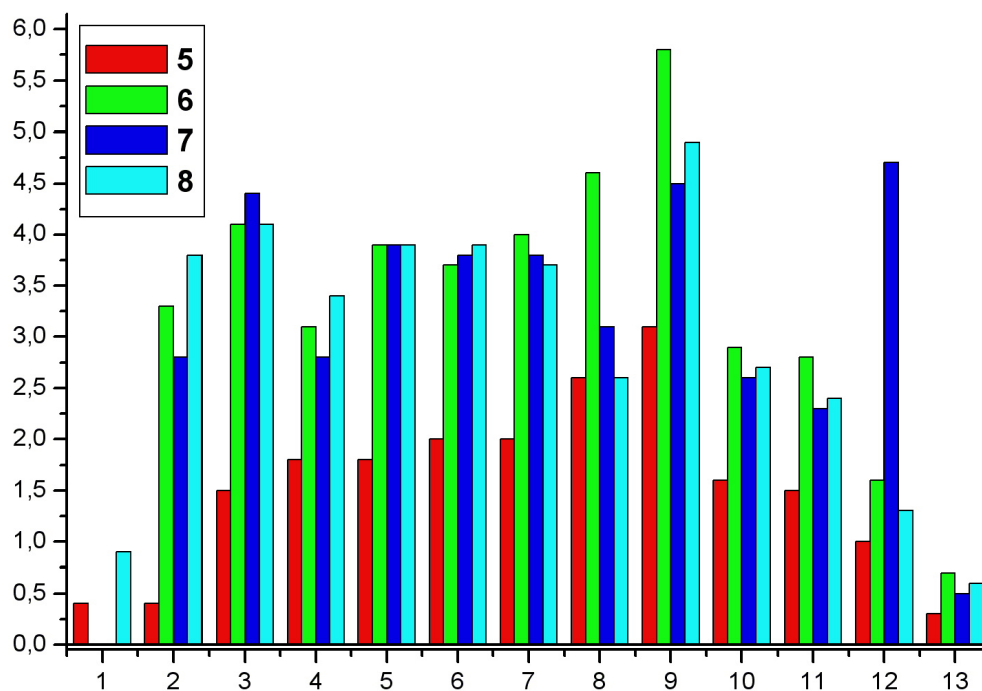

**Figure S6.**  $\Delta\delta_{C\alpha}$  observed for linear and cyclic VEGF<sub>13-25</sub> analogues **15-18**. Missing bars correspond to residues whose C $\alpha$  chemical shift was not assigned.

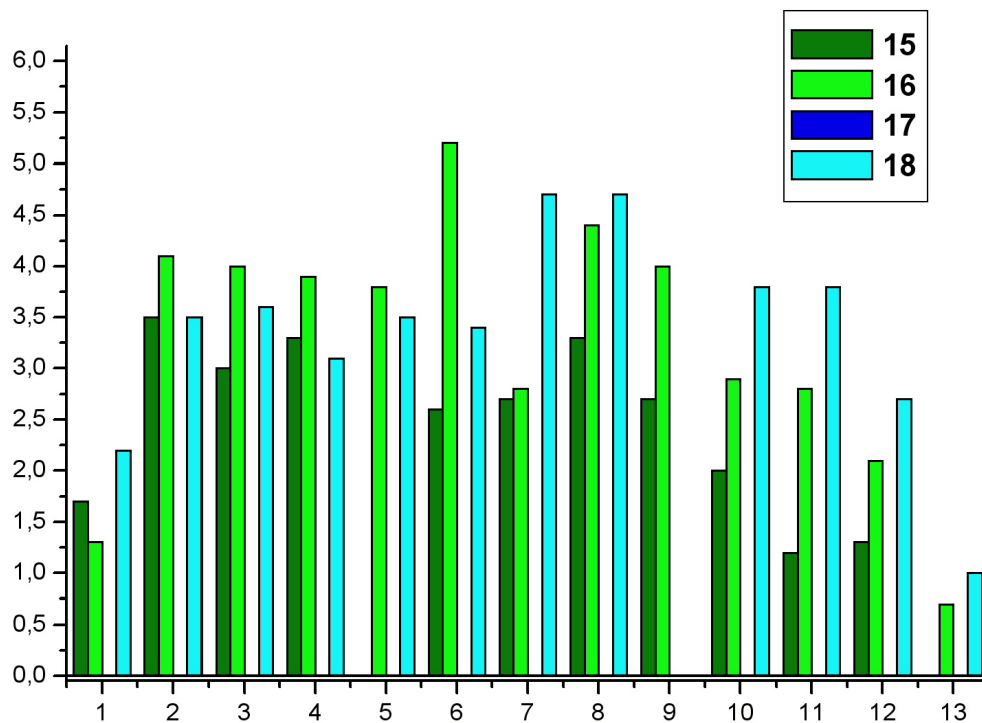

**Figure S7.** NOE summaries of VEGF<sub>13-25</sub> analogues **1-4** in 30% TFE at 25°C. N- and C-termini are, respectively, in acetylated and amidated. The thickness of the lines indicates the intensities of the sequential NOEs, i.e., strong, medium, weak.

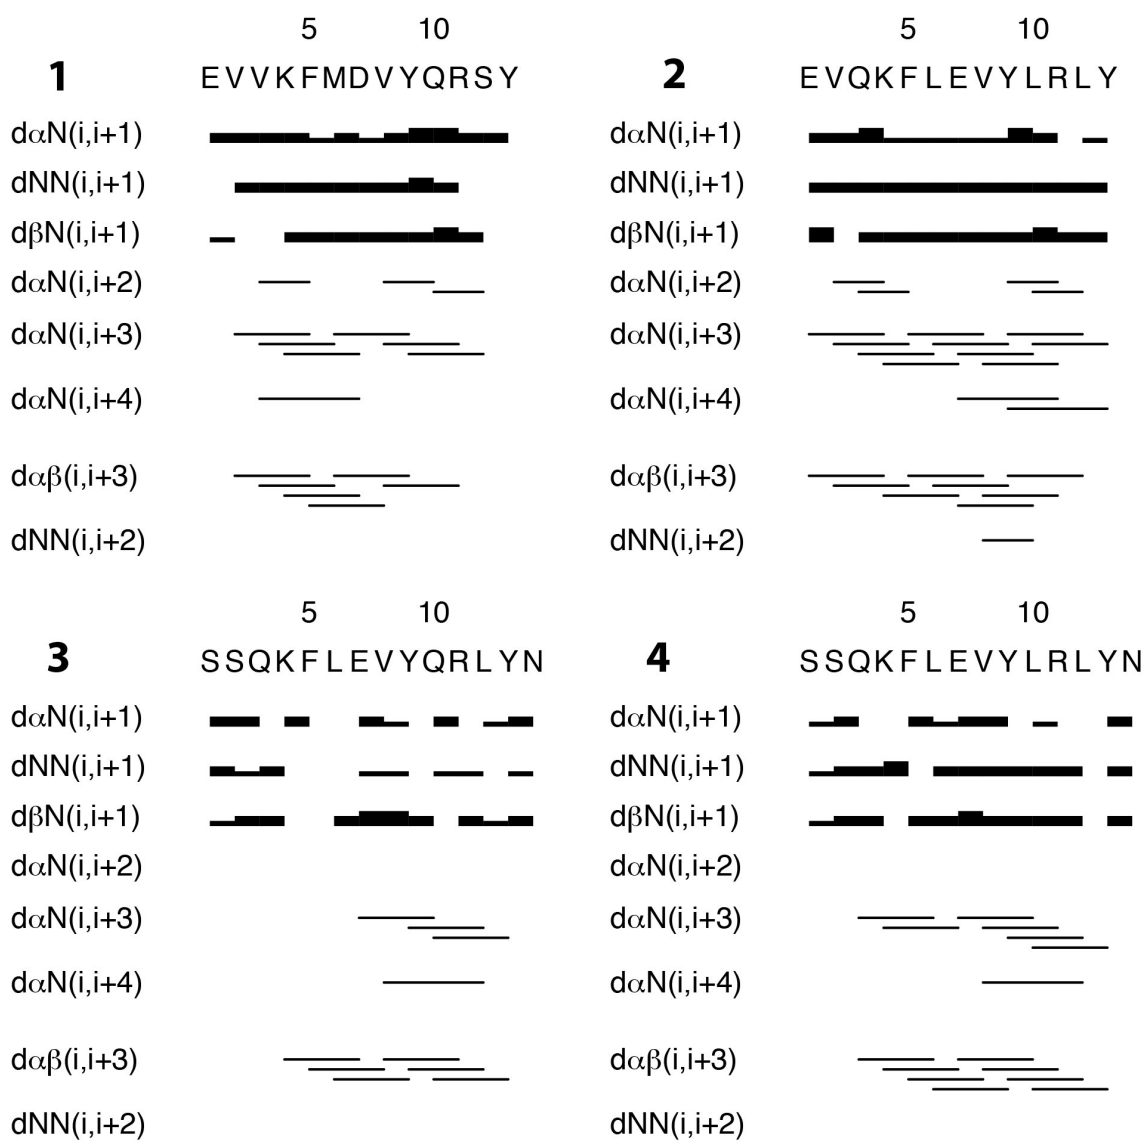



**Figure S8.** NOE summaries of Vammin<sub>1-13</sub> analogues **5-8** in 30% TFE at 25°C. N- and C-termini are, respectively, in acetylated and amidated. The thickness of the lines indicates the intensities of the sequential NOEs, i.e., strong, medium, weak.

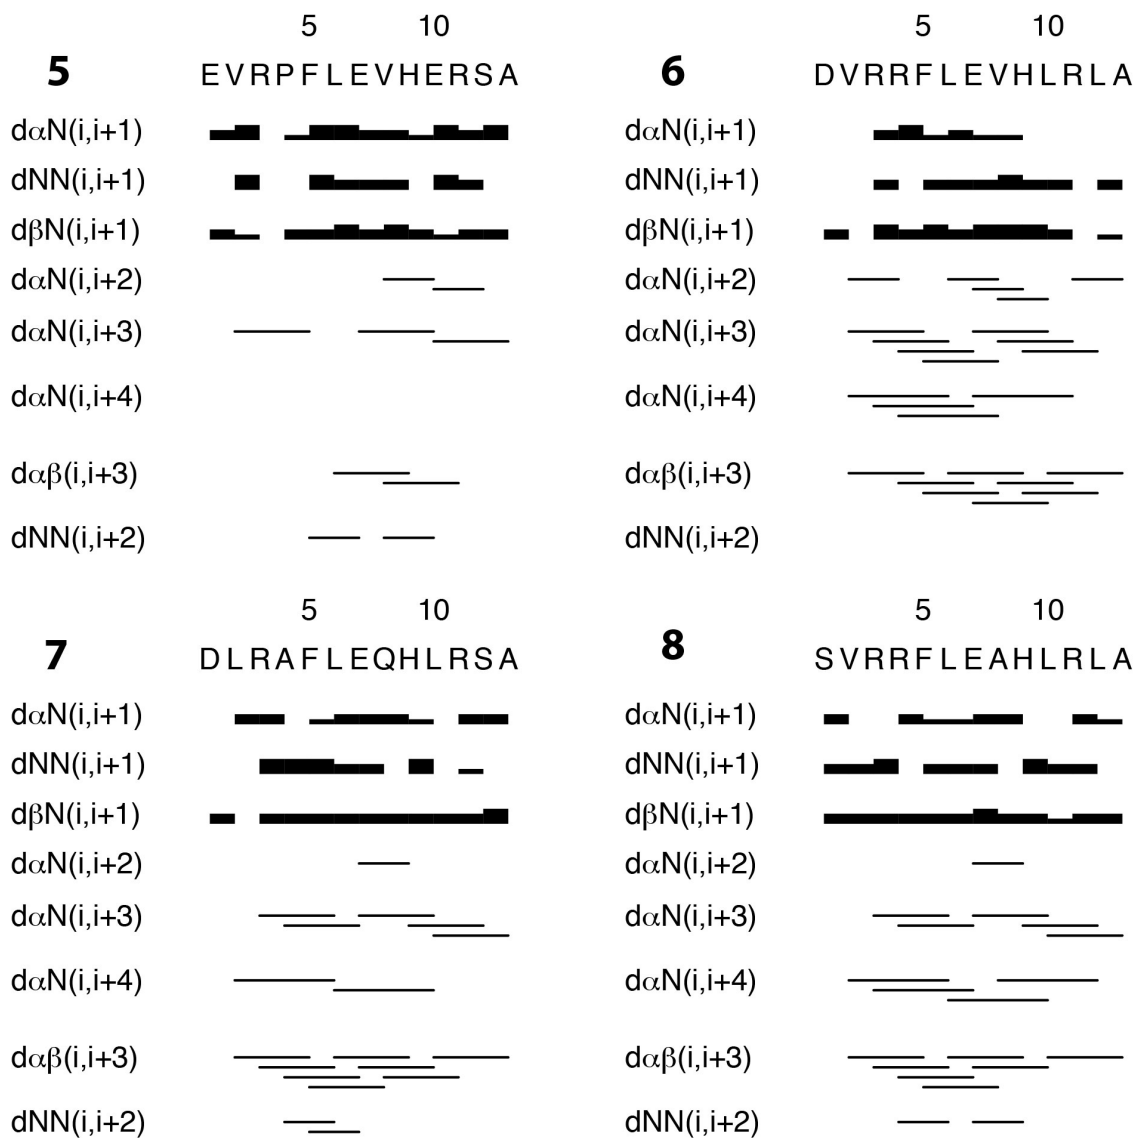

**Figure S9.** NOE summaries of VEGF<sub>13-25</sub> analogues **15-18** in 30% TFE at 25°C. N- and C-termini are, respectively, in acetylated and amidated. The thickness of the lines indicates the intensities of the sequential NOEs, i.e., strong, medium, weak.

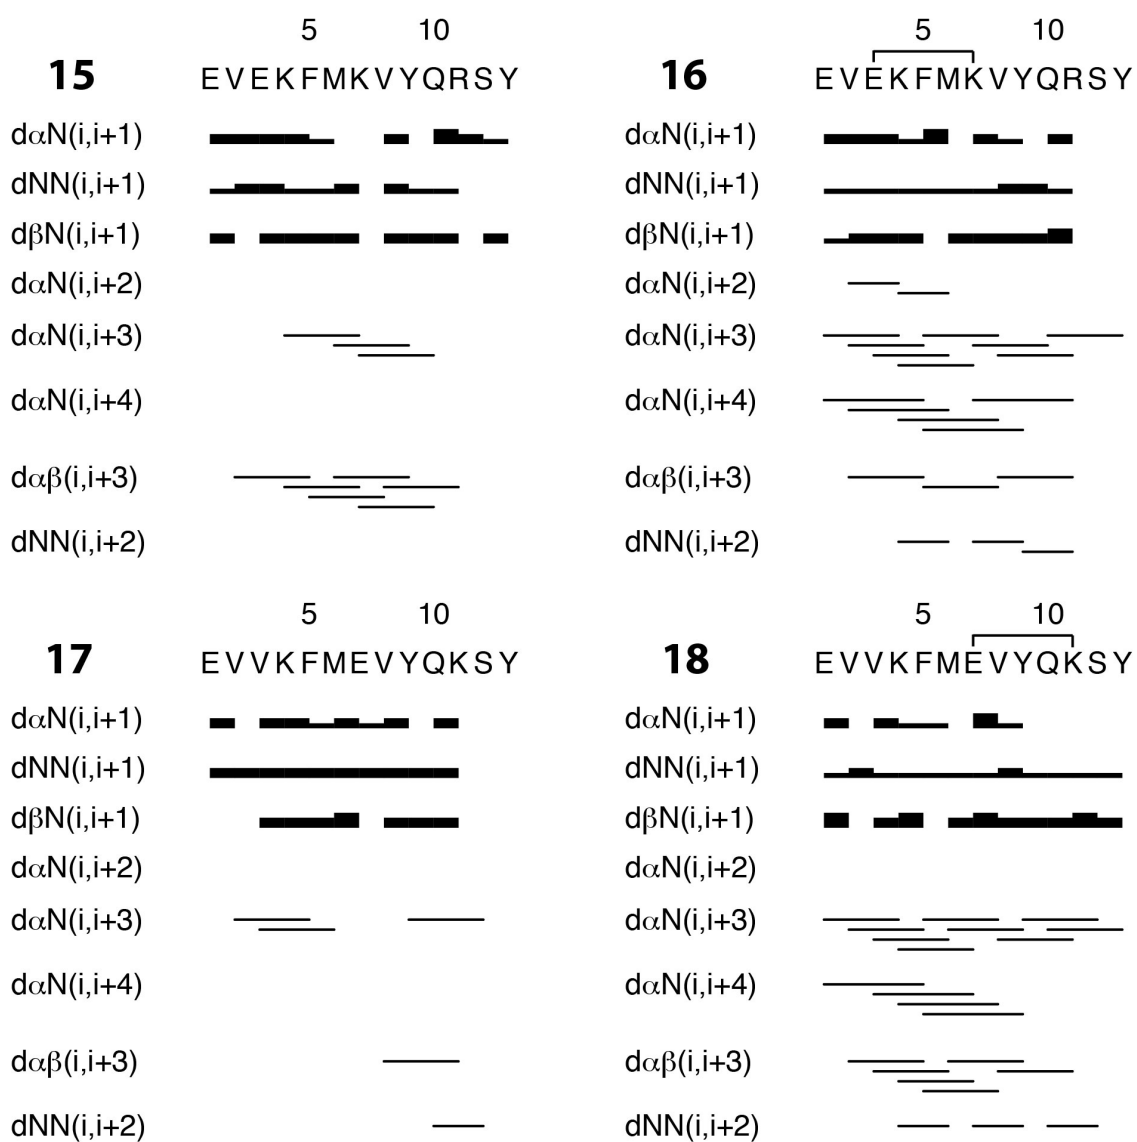

**Figure S10.** NMR structures of VEGF and Vammin analogues: (Left) Ribbon representation of the calculated structure with the lowest target function. For some peptides the side chains of one or two are not seen because they lie behind the ribbon. (Right) Superposition of the 20 NMR calculated structures. Backbone atoms are shown in black. Side chains are colored in red for the negatively charged residues (Glu/Asp), in blue for the positively charged residues (Lys/Arg), in cyan for the polar residues (Ser/Gln/Asn), in magenta for the hydrophobic residues (Val/Leu/Met), and in green for the residues reported as key for the interaction with VEGF receptors (F5, Y9 & Y13 in VEGF analogues and the equivalent residues F5, H9 & A13 in Vammin analogues). Hydrogen atoms are not shown. All the residues are labeled and the N- and C-ends are indicated.

## Peptide 1

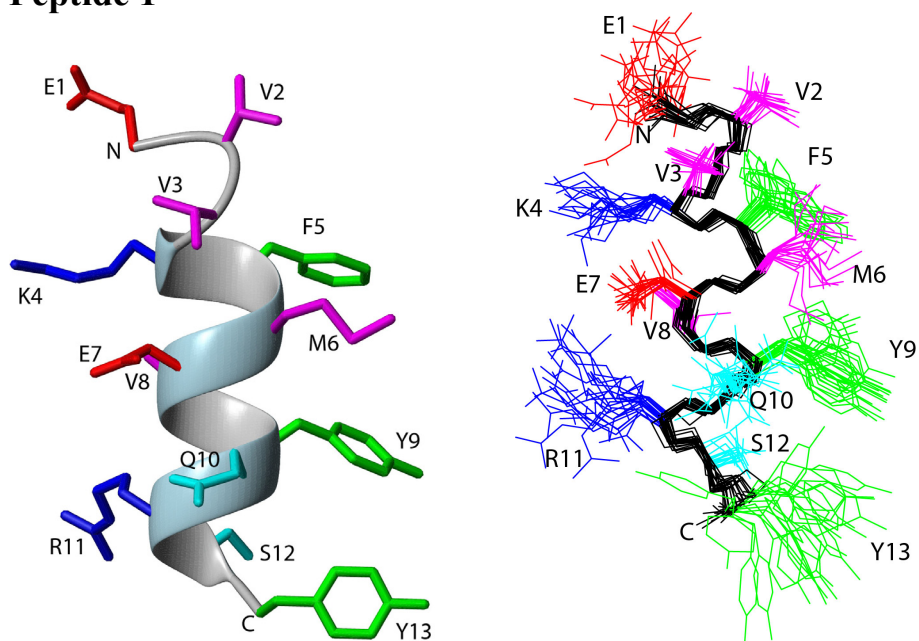

## Peptide 2

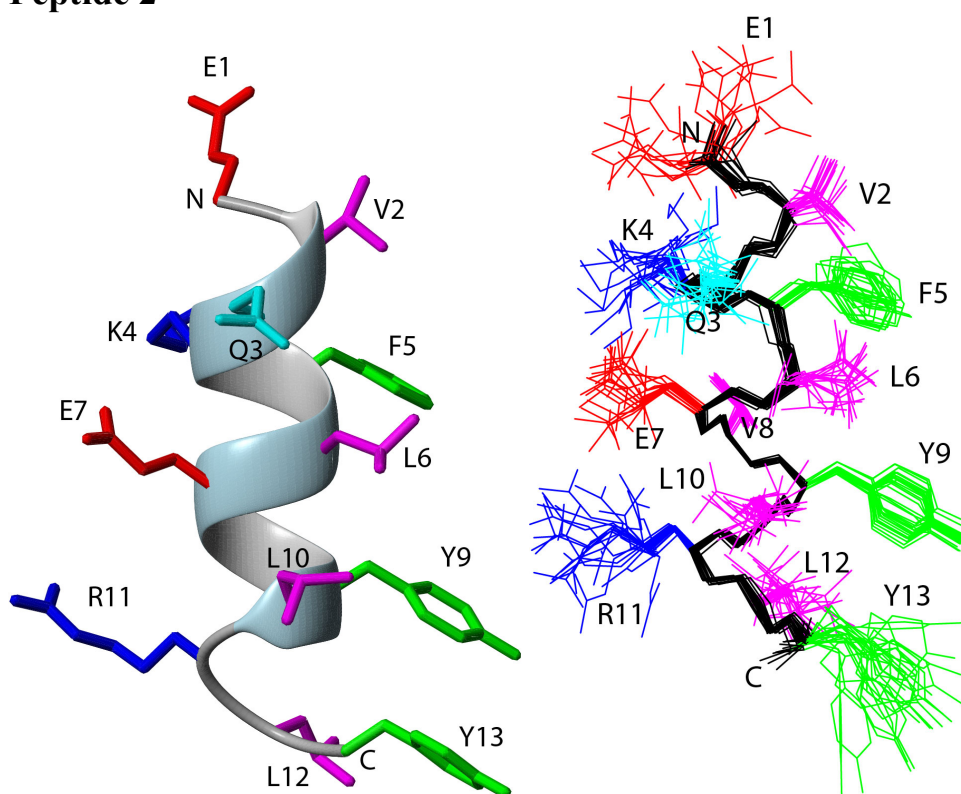

### Peptide 3

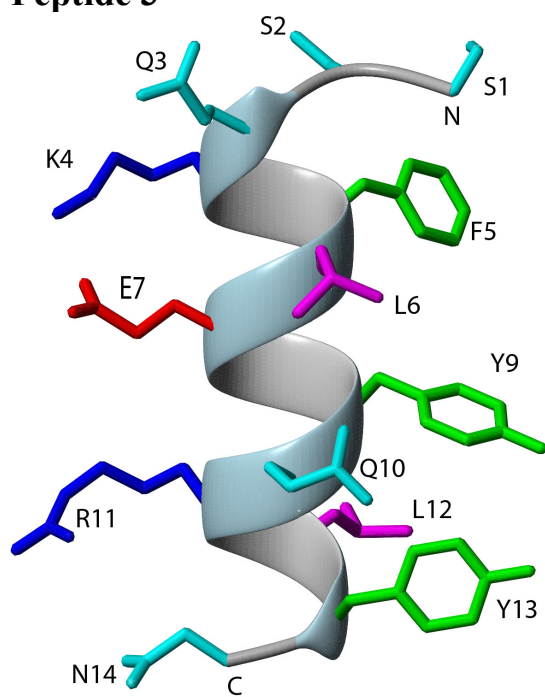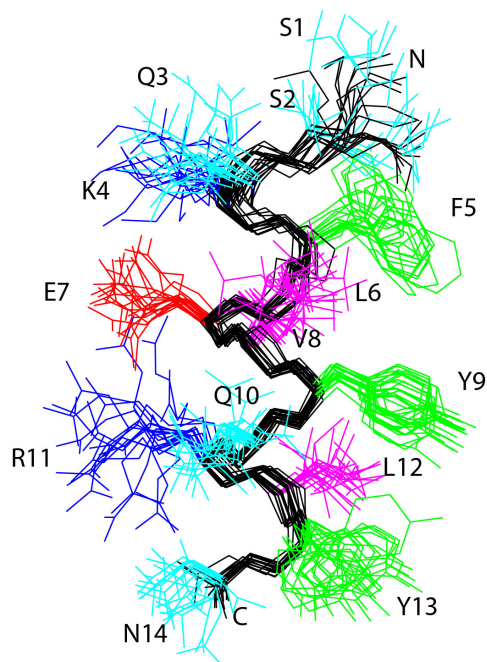

### Peptide 4

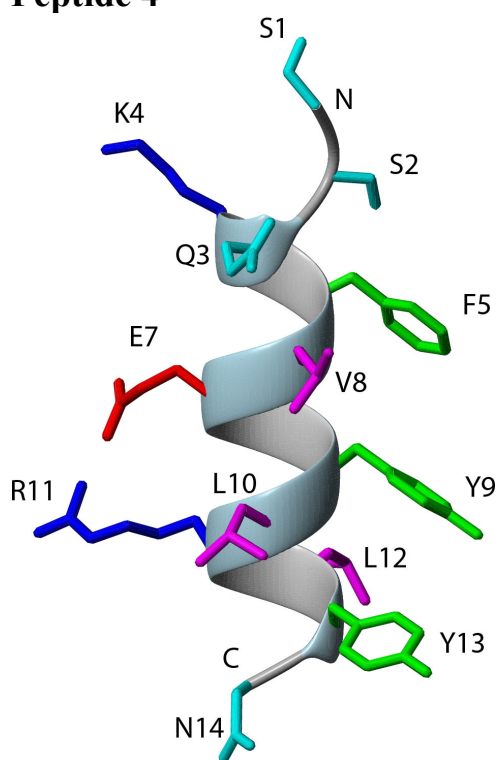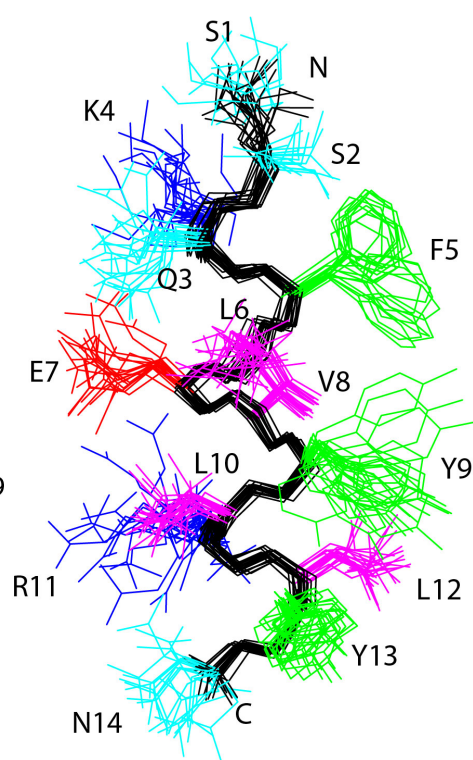

## Peptide 5

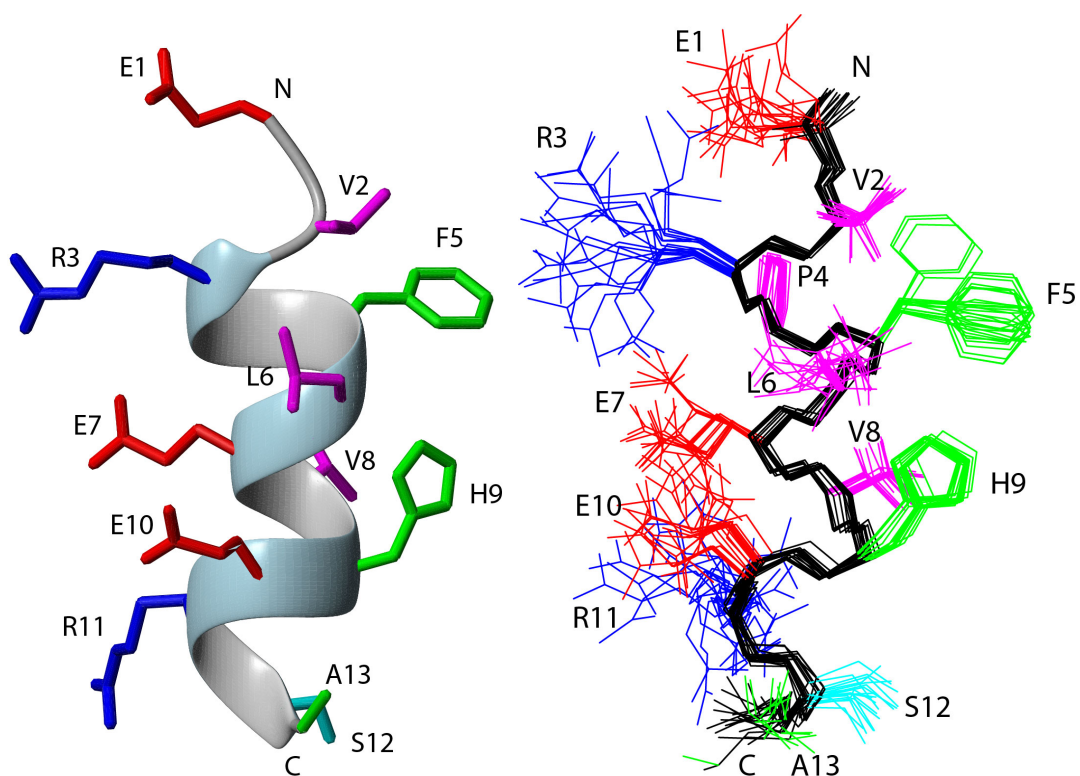

## Peptide 6

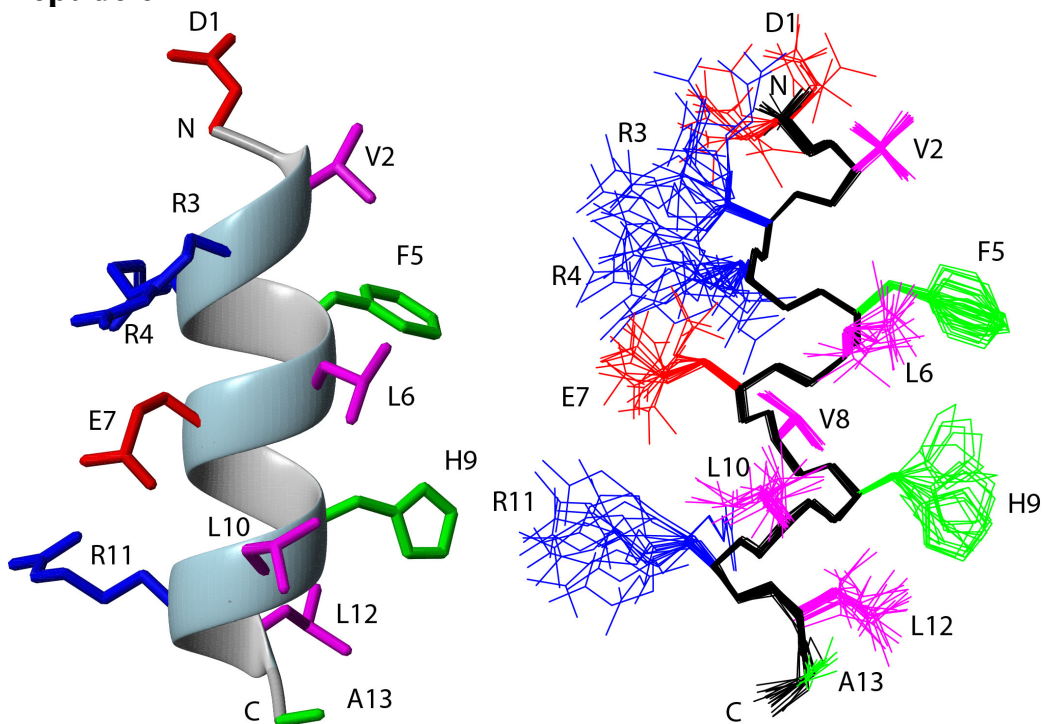

### Peptide 7

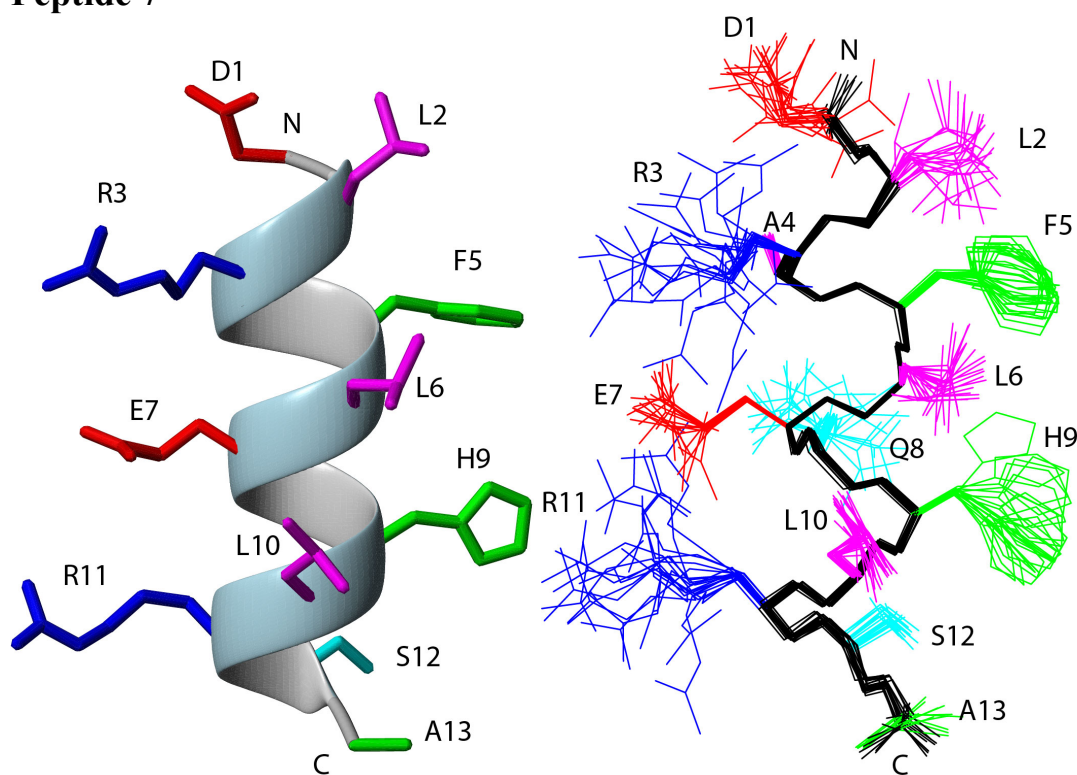

### Peptide 8

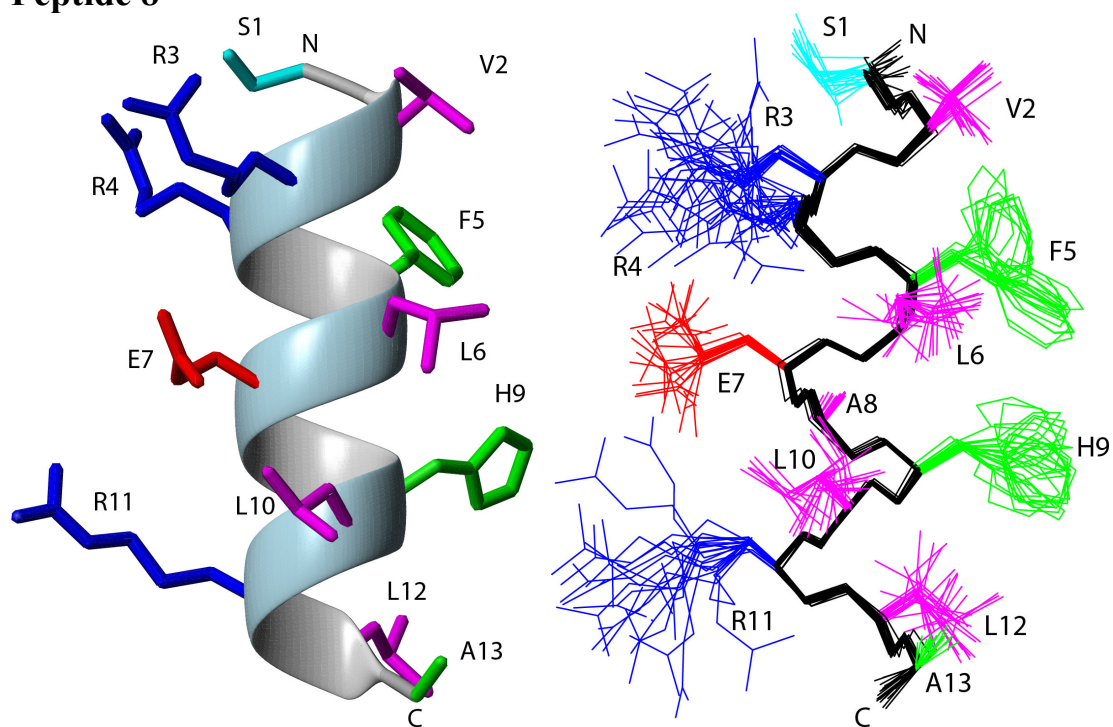

### Peptide 15

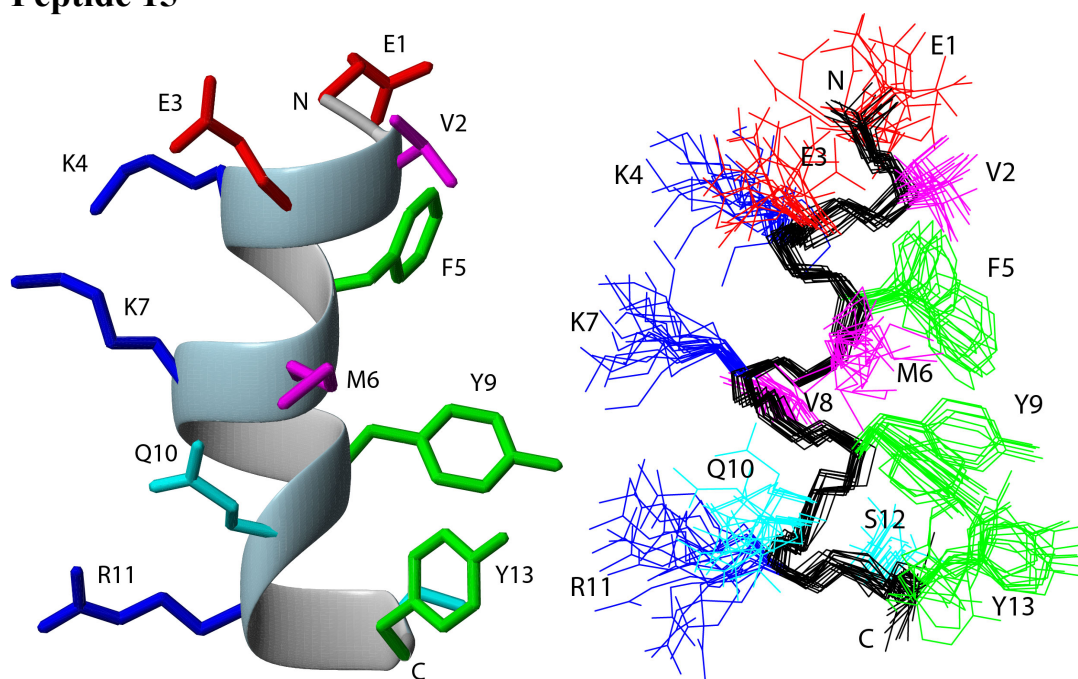

### Peptide 16

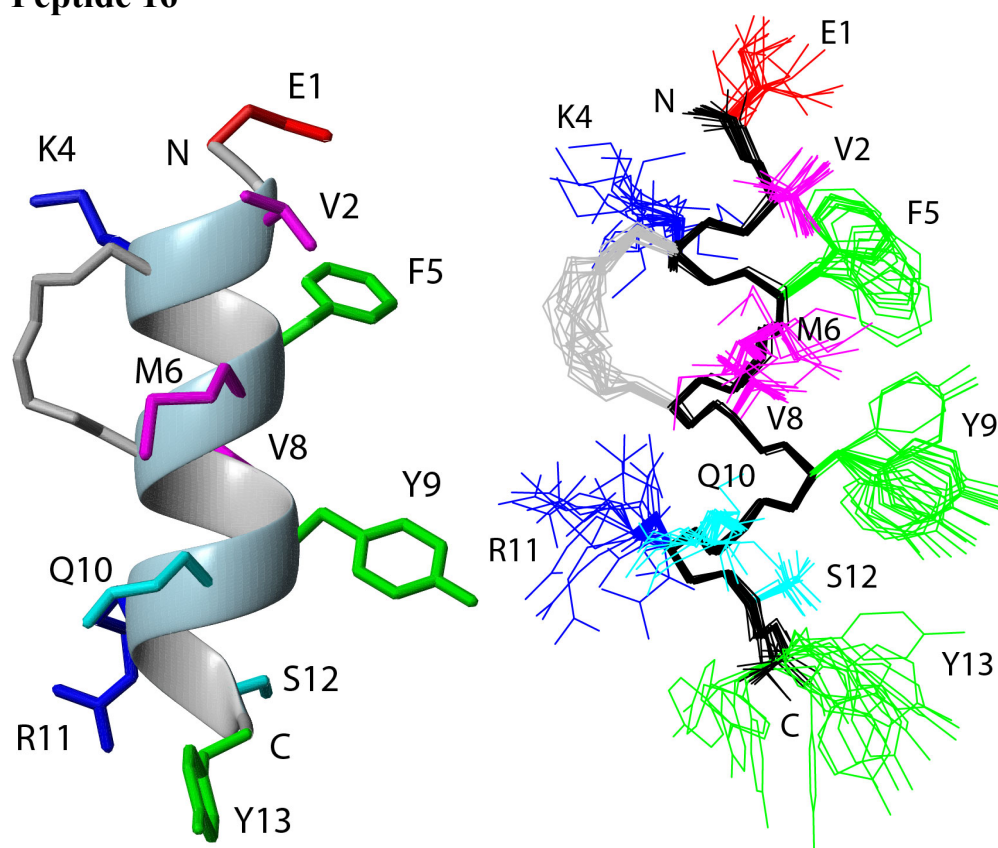



## Peptide 17

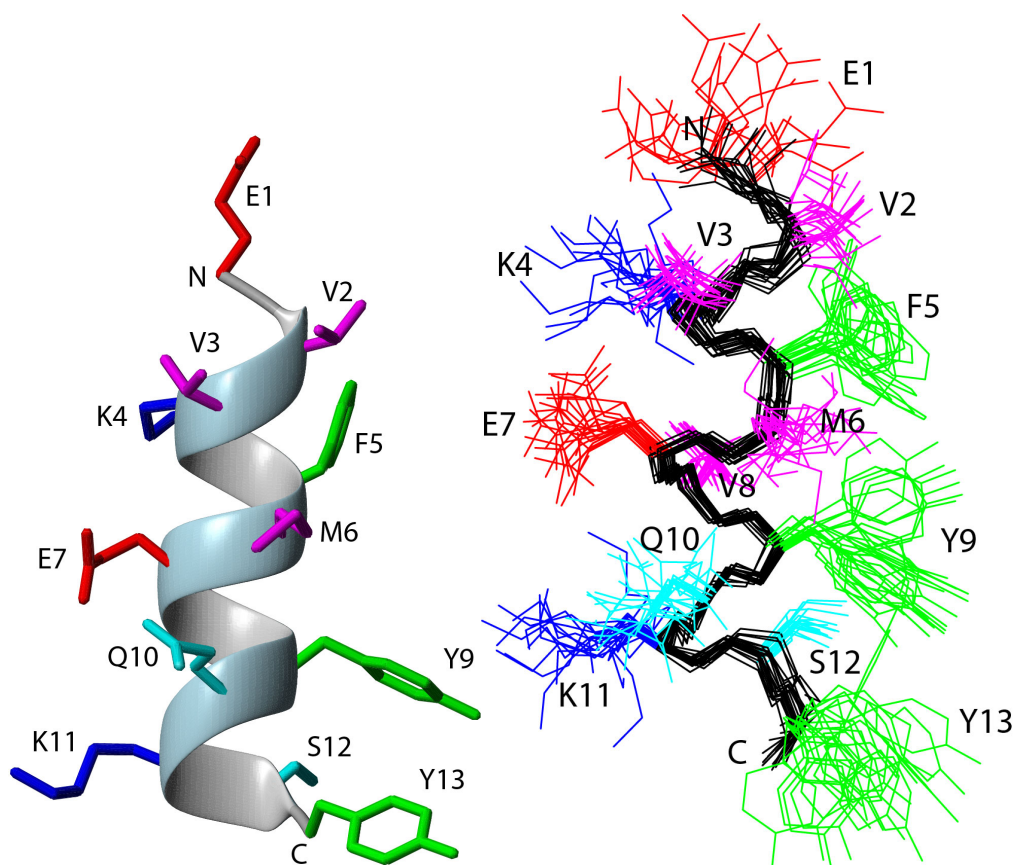

## Peptide 18

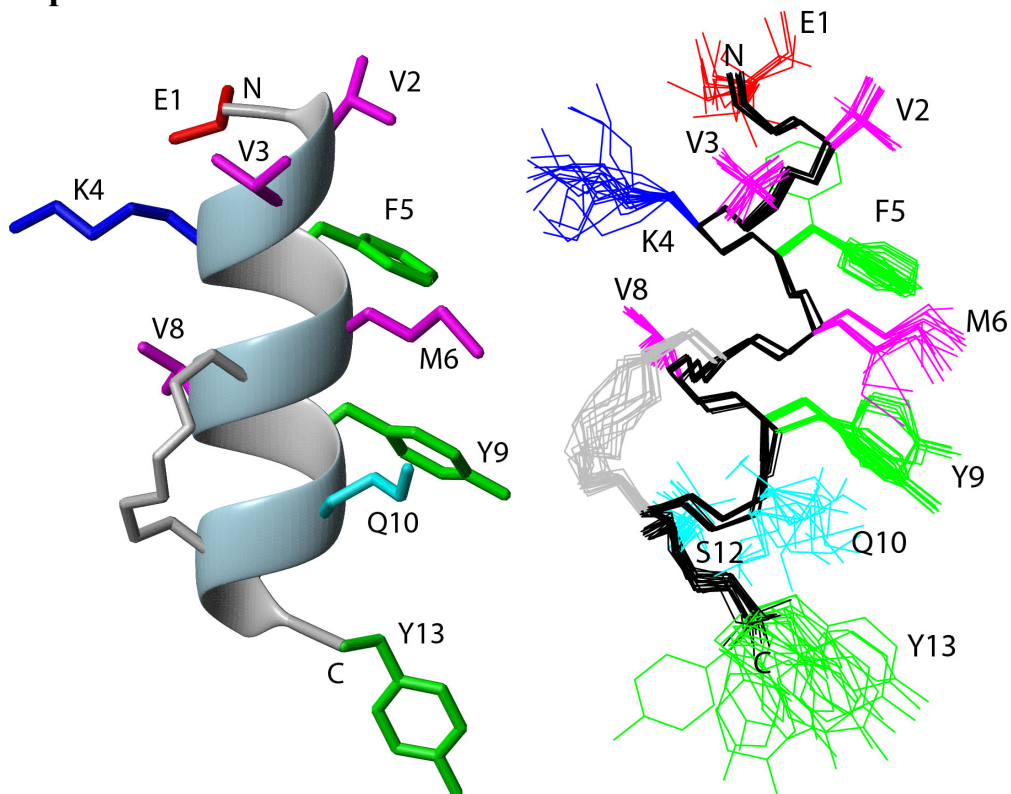

**Chemiluminescent competition assays. Reagents and materials.** High-binding 96-well microplates were from Corning Life Sciences, Netherlands. Recombinant human VEGFR-1 ECD/Fc Chimera, VEGFR-1 D1-D3/Fc chimera and btVEGF<sub>165</sub> obtained as part of a Fluorokine biotinylated VEGF kit, were from R&D Systems, UK. Bovine serum albumin fraction V, BSA was from Sigma-Aldrich, France. AMDEX streptavidin-horseradish peroxidase was from Amersham Biosciences, UK, SuperSignal West Pico Chemiluminescent Substrate from Pierce, USA. Luminescence was quantified with an EnVision 2101 Multilabel Reader from PerkinElmer, USA. Data were analyzed using GraphPad Prism software version 4.03, USA.
